1           **Integration of Apocarotenoid Profile and Expression Pattern of *Carotenoid***  
2                           ***Cleavage Dioxygenases* during Mycorrhization in Rice**

3   **Cristina Votta<sup>1\*</sup>, Jian You Wang<sup>2\*</sup>, Nicola Cavallini<sup>3</sup>, Francesco Savorani<sup>3</sup>, Kit Xi Liew<sup>2</sup>,**  
4   **Luisa Lanfranco<sup>1</sup>, Salim Al-Babili<sup>2,4#</sup>, Valentina Fiorilli<sup>1#</sup>**

5           1   Department of Life Sciences and Systems Biology, University of Torino, Viale Mattioli 25,  
6           Torino 10125, Italy.

7           2   The BioActives Lab, Center for Desert Agriculture, King Abdullah University of Science  
8           and Technology, Thuwal, 23955-6900, Saudi Arabia

9           3   Institute of Chemistry, Department of Applied Science and Technology (DISAT),  
10          Polytechnic University of Turin, Corso Duca degli Abruzzi 24, 10129 Torino, Italy

11          4   The Plant Science Program, Biological and Environmental Science and Engineering  
12          Division, King Abdullah University of Science and Technology, Thuwal, 23955-6900,  
13          Saudi Arabia

14   \* These authors contributed equally to this work

15   # Correspondence: [valentina.fiorilli@unito.it](mailto:valentina.fiorilli@unito.it), [salim.babili@kaust.edu.sa](mailto:salim.babili@kaust.edu.sa)

16   [valentina.fiorilli@unito.it](mailto:valentina.fiorilli@unito.it) (<https://orcid.org/0000-0001-9805-1559>)

17   [salim.babili@kaust.edu.sa](mailto:salim.babili@kaust.edu.sa) (<https://orcid.org/0000-0003-4823-2882>)

18

19

20   Number of tables: 1

21   Number of figures: 5

22   Word count: 4661 words

23   Supplementary data figures: 7

24   Supplementary data tables: 1

25   Running title: Apocarotenoid profile and *CCD* expression in AM symbiosis

26

## 27 **Highlight**

28 Our study presents the profiles of *CCD* gene expression and apocarotenoids across different stages  
29 of AM symbiosis and Pi supply conditions and reveals novel AM markers at both local and  
30 systemic levels.

## 31 **Abstract**

32 Carotenoids are susceptible to degrading processes initiated by oxidative cleavage reactions  
33 mediated by Carotenoid Cleavage Dioxygenases that break their backbone, leading to products  
34 called apocarotenoids. These carotenoid-derived metabolites include the phytohormones abscisic  
35 acid and strigolactones, and different signaling molecules and growth regulators, which are utilized  
36 by plants to coordinate many aspects of their life. Several apocarotenoids have been recruited for  
37 the communication between plants and arbuscular mycorrhizal (AM) fungi and as regulators of the  
38 establishment of AM symbiosis. However, our knowledge on their biosynthetic pathways and the  
39 regulation of their pattern during AM symbiosis is still limited. In this study, we generated a  
40 qualitative and quantitative profile of apocarotenoids in roots and shoots of rice plants exposed to  
41 high/low phosphate concentrations, and upon AM symbiosis in a time course experiment covering  
42 different stages of growth and AM development. To get deeper insights in the biology of  
43 apocarotenoids during this plant-fungal symbiosis, we complemented the metabolic profiles by  
44 determining the expression pattern of *CCD* genes, taking advantage of chemometric tools. This  
45 analysis revealed the specific profiles of *CCD* genes and apocarotenoids across different stages of  
46 AM symbiosis and phosphate supply conditions, identifying novel markers at both local and  
47 systemic levels.

## 48 **Keywords**

49 Apocarotenoids, arbuscular mycorrhizal symbiosis, *Carotenoid Cleavage Dioxygenases*,  
50 chemometric tools, rice, strigolactone, zaxinone.

51

## 52 **Introduction**

53 Carotenoids represent are a widespread class of tetraterpene (C<sub>40</sub>) lipophilic pigments, synthesized  
54 by all photosynthetic organisms, including bacteria, algae, and plants, and by numerous non-  
55 photosynthetic microorganisms (Moise *et al.*, 2014; Nisar *et al.*, 2015). In plants, carotenoids are  
56 essential constituents of the photosynthetic apparatus where they act as photo-protective pigments  
57 and take part in the light-harvesting process. Further, these pigments have ecological functions,  
58 providing flowers and fruits with specific colors and flavors that attract insects and other animals or  
59 act as a repellent for pathogens and pests (Cazzonelli, 2011).

60 The carotenoid structure, rich in electrons and conjugated double bonds, makes them susceptible to  
61 oxidation, which causes the breakage of their backbone and leads to a wide range of metabolites  
62 called apocarotenoids (Moreno *et al.*, 2021). These compounds can be generated by non-enzymatic  
63 processes that are triggered by reactive oxygen species (ROS) (Harrison and Bugg, 2014; Ahrazem  
64 *et al.*, 2016) or by the action of a ubiquitous family of non-heme iron enzymes, Carotenoid  
65 Cleavage Dioxygenases (CCDs) (Jia *et al.*, 2018).

66 The genome of the model plant *Arabidopsis thaliana* encodes nine members of the CCD family,  
67 including five *NINE-CIS-EPOXY CAROTENOID CLEAVAGE DIOXYGENASES* (*NCED2*,  
68 *NCED3*, *NCED5*, *NCED6*, and *NCED9*) and four *CCDs* (*CCD1*, *CCD4*, *CCD7*, and *CCD8*) (Tan *et al.*,  
69 *et al.*, 2003; Sui *et al.*, 2013). In short, NCEDs catalyze the first step in abscisic acid (ABA, C<sub>15</sub>)  
70 biosynthesis, i.e. the cleavage of 9-*cis*-violaxanthin or 9'-*cis*-neoxanthin into the ABA precursor  
71 xanthoxin (Nambara and Marion-Poll, 2005; Ahrazem *et al.*, 2016). CCD1 cleaves several  
72 carotenoids and apocarotenoids at different positions along their hydrocarbon backbone (Schwartz  
73 *et al.*, 2001; Vogel *et al.*, 2008; Ilg *et al.*, 2009, 2014; Jia *et al.*, 2018) generating volatiles, such as  
74 β-ionone and geranylacetone, and a diverse set of dialdehydes in fruits and flowers of many plant  
75 species (Moreno *et al.*, 2021). CCD4 enzymes are known to produce apocarotenoid-derived  
76 pigments, flavors, and aromas *in planta*, but their cleavage specificities differ considerably from  
77 those of CCD1 enzymes (Schwartz *et al.*, 2001; Auldridge *et al.*, 2006; Ilg *et al.*, 2009; McQuinn *et al.*,  
78 *et al.*, 2015; Hou *et al.*, 2016). In plants, two different forms of CCD4 are present (Huang *et al.*, 2009;  
79 Mi and Al-Babili, 2019): the first one is common in *Citrus* and is involved in forming the pigment  
80 citraurin (3-hydroxy-β-apo-8'-carotenal, C<sub>30</sub>) formation by catalyzing a single cleavage reaction at  
81 the 7',8' double bond of zeaxanthin and β-cryptoxanthin (Ma *et al.*, 2013; Rodrigo *et al.*, 2013),  
82 while the other type cleaves bicyclic all-*trans*-carotenoids at the C<sub>9</sub>, C<sub>10</sub> or C<sub>9'</sub>, C<sub>10'</sub> double bond  
83 leading to apo-10'-carotenoids (C<sub>27</sub>) and the corresponding C<sub>13</sub> cyclohexenones, e.g. β-ionone  
84 (Bruno *et al.*, 2015, 2016). Recently, a *Gardinia* CCD4 enzyme (GjCCD4a) was shown to catalyze

85 sequential cleavage of  $\beta$ -carotene and zeaxanthin at the C7, C8 and C8', C9' leading to crocetin  
86 dialdehyde, the precursor of the saffron pigment crocins, and to cyclocitral and 3-hydroxy-  
87 cyclocitral, respectively (Zheng *et al.*, 2022).

88 The two CCD-subfamilies CCD7 and CCD8 are involved in the biosynthesis of the plant hormone  
89 strigolactones (SLs) (Wang *et al.*, 2021). CCD7 cleaves 9-*cis*- $\beta$ -carotene (C<sub>40</sub>), yielding  $\beta$ -ionone  
90 and 9-*cis*- $\beta$ -apo-10'-carotenal (C<sub>27</sub>); while CCD8 converts 9-*cis*-apo-10'-carotenal (C<sub>27</sub>) *via* a  
91 combination of different reactions into the SL precursor carlactone (C<sub>19</sub>) and  $\omega$ -OH-(4-CH<sub>3</sub>)  
92 heptanal (C<sub>8</sub>) (Alder *et al.*, 2012; Chen *et al.*, 2022). In addition, CCD7 may also catalyze the initial  
93 9,10 cleavage required for mycorradicin synthesis (Floss *et al.*, 2008).

94 A recent survey on plant genomes identified the Zaxinone Synthase (ZAS) as a representative for a  
95 further CCD subfamily, which is conserved in most land plants but missing in non-mycorrhizal  
96 species, i.e., *A. thaliana* (Fiorilli *et al.*, 2019; Wang *et al.*, 2019). *In vitro*, this enzyme cleaves the  
97 apocarotenoid 3-OH- $\beta$ -apo-10'-carotenal (C<sub>27</sub>) at the C13-C14 double bond, generating zaxinone, a  
98 C<sub>18</sub>-ketone (3-OH- $\beta$ -apo-13-carotenone) that acts as a growth regulator, and an unstable C<sub>9</sub>-  
99 dialdehyde (Wang *et al.*, 2019). Loss-of-function *zas* mutant showed a decreased zaxinone content  
100 in roots, reduced shoot, and root growth, and a higher SL level compared to wild-type rice plants  
101 (Wang *et al.*, 2019). Phylogenetic analyses revealed that the rice genome encodes three *OsZAS*  
102 homologs, named *OsZAS1b*, *OsZAS1c*, and *OsZAS2* (Ablazov *et al.*, 2023). Intriguingly, although  
103 *OsZAS2* is placed in a clade different from that of ZAS, it catalyzes the same reaction, and both  
104 enzymes contribute to zaxinone production in rice (Ablazov *et al.*, 2023).

105 Apocarotenoids play several roles in plants, from regulating root and shoot developmental  
106 processes to coordinating plant responses to abiotic and biotic stress (Moreno *et al.*, 2021). They are  
107 also emerging signaling molecules implicated in plant-microbe interactions, including the  
108 arbuscular mycorrhizal (AM) symbiosis (Fiorilli *et al.*, 2019). The AM symbiosis is one of the most  
109 ancient and widespread associations, formed by approximately 70% of land plants (Wang and Qiu,  
110 2006; Brundrett, 2009), including major crops, with soil fungi belonging to the Glomeromycotina  
111 group (Spatafora *et al.*, 2016). In this symbiosis, the fungus facilitates the plant uptake of minerals,  
112 predominantly phosphorus (P) and nitrogen (N) (Smith *et al.*, 2011), and the tolerance to biotic and  
113 abiotic stress (Pozo *et al.*, 2010; Chen *et al.*, 2018). Meanwhile, the plant provides the fungus with  
114 fixed organic carbon. The establishment of the AM symbiosis includes several steps, starting with  
115 partner recognition *via* diffusible molecules that activate the common symbiosis signaling pathway  
116 (MacLean *et al.*, 2017) and trigger the development of fungus adhesion structures, called  
117 hyphopodia, on the root epidermis. These structures permit the fungus to enter the host root tissues  
118 and proliferate within cells or intracellularly (Bonfante and Requena, 2011; Nadal and Paszkowski,

119 2013). Finally, fungal hyphae invade the inner cortical layers, penetrate single cells and form highly  
120 branched tree-shaped hyphal structures, the arbuscules, where nutrient exchanges occur (Harrison,  
121 2012; Gutjahr and Parniske, 2013). During these stages, the plant controls fungal expansion and  
122 symbiotic functions, by activating a series of cellular, metabolic, and physiological changes  
123 (Gutjahr, 2014; Carbonnel and Gutjahr, 2014). Among the environmental factors that regulate AM  
124 colonization, phosphate (Pi) availability is certainly one of the most crucial ones (Smith *et al.*,  
125 2011; Richardson *et al.*, 2011). It has been recently shown that a complex gene network centered on  
126 the plant Pi starvation response actively supervises AM fungal development in roots, acting at the  
127 local and systemic level (Shi *et al.*, 2021; Das *et al.*, 2022). Pi starvation also induces SL  
128 biosynthesis and release (Yoneyama *et al.*, 2007; Wang *et al.*, 2017, 2022), while high Pi levels  
129 repress the expression of genes involved in the biosynthesis of carotenoids and SLs in root  
130 (Carbonnel and Gutjahr, 2014; Haider *et al.*, 2023). SLs are the best-known plant molecules active  
131 in the pre-symbiotic interaction with AM fungi. In Pi-starved plants, SLs are produced by roots and  
132 exported to the rhizosphere, which directly stimulates AM fungal metabolism, gene expression, and  
133 hyphal branching, supporting the development of this symbiosis (Waters *et al.*, 2017; Müller and  
134 Harrison, 2019). Notably, (Volpe *et al.*) recently showed that SL biosynthesis is stimulated by  
135 chito-oligosaccharides released by AM fungi.

136 Studies of the last decade highlighted that other apocarotenoid compounds are involved in the AM  
137 symbiosis (Fiorilli *et al.*, 2019 and reference therein), including the plant hormone ABA that is  
138 known for coordinating plant's response to biotic and abiotic stress factors (Felemban *et al.*, 2019;  
139 Moreno *et al.*, 2021). ABA has been reported to be involved in mycorrhizal colonization in  
140 different host plants, probably through synergistic and antagonistic interactions with other  
141 hormones (Herrera-Medina *et al.*, 2007; Martín-Rodríguez *et al.*, 2011; Charpentier *et al.*, 2014).  
142 Specifically, a positive correlation between ABA levels and SL biosynthesis was observed,  
143 suggesting that ABA and SLs collaborate to influence the outcome of the symbiosis (López-Ráez *et al.*,  
144 2010). In contrast, ABA controls the normal development of arbuscules by inhibiting ethylene  
145 production (Martín-Rodríguez *et al.*, 2011) and acts as an antagonist of gibberellins (GA) by down-  
146 regulating their biosynthesis and promoting their catabolism (Floss *et al.*, 2013; Martín-Rodríguez  
147 *et al.*, 2016).

148 Blumenols (C<sub>13</sub>) and mycorradicin (C<sub>14</sub>) are further apocarotenoids associated with AM symbiotic  
149 establishment and maintenance (Walter *et al.*, 2007; Floß *et al.*, 2008; Floss *et al.*, 2008; Fiorilli *et al.*,  
150 2019) and described as a signature for AM symbiosis because of their being specifically  
151 accumulated in mycorrhizal plants (Walter *et al.*, 2007; Hill *et al.*, 2018; Moreno *et al.*, 2021).  
152 Mycorradicins cause typical yellow/orange pigmentation of roots, which enabled their identification

153 (Scannerini and Bonfante-Fasolo, 1977; Klingner *et al.*, 1995; Floss *et al.*, 2008). Blumenols are  
154 accumulated in roots and shoots of host plants in direct correlation with the fungal colonization rate  
155 (Klingner *et al.*, 1995; Maier *et al.*, 1997; Walter *et al.*, 2000; Fester *et al.*, 2002; Strack and Fester,  
156 2006). Even if their biological role has not yet been clarified, blumenols have been proposed as  
157 foliar markers that allow rapid detection of AM symbiosis and screening of functional AM  
158 associations (Walter *et al.*, 2010; Wang *et al.*, 2018). Finally, zaxinone, a recently discovered  
159 apocarotenoid growth regulator (Wang *et al.*, 2019; Ablazov *et al.*, 2020) is also involved in AM  
160 symbiosis and acts as a component of a regulatory network that includes SLs, as demonstrated by  
161 that the impact of the rice gene encoding Zaxinone Synthase (*OsZAS*) on the extent of AM  
162 colonization SLs (Votta *et al.*, 2022).

163 In the current study, we further explored the involvement of apocarotenoids in the AM symbiosis.  
164 For this purpose, we generated a qualitative and quantitative profile of apocarotenoids in roots and  
165 shoots of rice plants exposed to high/low Pi concentrations (+Pi and -Pi) and upon AM symbiosis in  
166 a time course experiment covering different stages of growth and AM development. We  
167 complemented the metabolic profiles by characterizing the expression pattern of *CCD* genes and  
168 took advantage of chemometric tools to get deeper insights in the biology of apocarotenoids during  
169 this plant-fungal symbiosis.

## 170 **Materials and methods**

171 **Plant and fungal materials.** Rice seeds of wild-type (WT) (cv. Nipponbare) were germinated in  
172 pots containing sand and incubated for 10 days in a growth chamber under 14 h light (23 °C)/10 h  
173 dark (21 °C). A set of plants (MYC) was inoculated with *Funneliformis mosseae* (BEG 12,  
174 MycAgroLab, France). The fungal inoculum (15%) was mixed with sterile quartz sand and used for  
175 colonization. A group of non-mycorrhizal plants (no-myc -Pi) was also set up. These two groups of  
176 plants (MYC and no-myc -Pi) were watered with a modified Long-Ashton (LA) solution containing  
177 3.2 µM Na<sub>2</sub>HPO<sub>4</sub>·12H<sub>2</sub>O (low Pi) and grown in a growth chamber under 14 h light (24 °C)/10 h  
178 dark (20 °C) regime. Another group of no-myc WT plants was watered with a LA containing 500  
179 µM Na<sub>2</sub>HPO<sub>4</sub>·12 H<sub>2</sub>O (+Pi) and grown in the same condition described above; these plants were  
180 considered the no-myc + Pi samples. Plants for the three different conditions (MYC, no-myc -Pi,  
181 no-myc +Pi) were collected at three time points: 7 days post-inoculation (dpi), 21 dpi, and 35 dpi.  
182 For the molecular and metabolites analyses, roots and shoots samples were harvested and  
183 immediately frozen in liquid nitrogen and stored at -80° C.



184 **Qualitative and quantitative profiling of plant apocarotenoids (APOs).** Following the method  
185 used by Mi *et al.* (2018), about 20 mg lyophilized root and shoot tissue powder was spiked with  
186 Internal Standards (IS) mixture (2 ng each standard) and extracted with 2 mL of methanol  
187 containing 0.1% butylated hydroxytoluene (BHT) in an ultrasound bath (Branson 3510 ultrasonic  
188 bath) for 15 min, followed by the centrifugation. The supernatant was collected, and the pellet was  
189 re-extracted with 2 mL of the same solvent. The two supernatants were then combined and dried  
190 under vacuum. The residue was re-dissolved in 150  $\mu$ L of acetonitrile and filtered through a 0.22  
191 mm filter for LC-MS analysis.

192 Analysis of apocarotenoids was performed on a Dionex Ultimate 3000 UHPLC system coupled  
193 with a Q-Orbitrap-MS (Q-Exactive plus MS, Thermo Scientific) with a heated electrospray  
194 ionization source. Chromatographic separation was carried out on an ACQUITY UPLC BEH C<sub>18</sub>  
195 column (100 x 2.1mm, 1.7  $\mu$ m) with a UPLC BEH C18 guard column (5 x 2.1mm, 1.7 mm)  
196 maintained at 35° C. UHPLC conditions including mobile phases and gradients were optimized  
197 based on the separation of APOs and the time needed for sample analysis. APO isomers were  
198 identified by MS/MS fragmentation.

199 The quantification of APOs was calculated as follows: Amount [target APO] = Area [target  
200 APO]/Area [spiked IS] x Amount [spiked IS]/ mg materials. The experiment was repeated twice  
201 with equivalent results.

202 **Gene expression analysis.** Total RNA was extracted from WT rice roots using the Qiagen Plant  
203 RNeasy Kit according to the manufacturer's instructions (Qiagen, Hilden; Germany). Following the  
204 producer's directives, samples were treated with TURBO™ DNase (Thermofischer). The RNA  
205 samples were routinely checked for DNA contamination through PCR analysis. Single-strand  
206 cDNA was synthesized from 1  $\mu$ g of total RNA using Super-Script II (Invitrogen) according to the  
207 instructions in the user manual. Quantitative RT-PCR (qRT-PCR) was performed using a Rotor-  
208 Gene Q 5plex HRM Platform (Qiagen). All reactions were performed on at least three biological  
209 and three technical replicates. Baseline range and take-off values were automatically calculated  
210 using Rotor-Gene Q 5plex software. The transcript level of genes listed in **Supplemental Table 1**  
211 was normalized using *OsRubQ1* housekeeping gene (Güimil *et al.*, 2005). Only take-off values  
212 leading to a Ct mean with a standard deviation below 0.5 were considered. The experiment was  
213 repeated twice with equivalent results.

214 **Statistics and reproducibility.** Both experiments (plant apocarotenoid quantification and CCD  
215 gene expression analysis) were performed with at least three biological replicates each. Statistical  
216 tests were carried out through One-way analysis of variance (One-way ANOVA) and Tukey's *post*

217 *hoc* test, using a probability level of  $P < 0.05$ . All statistical elaborations were performed using  
218 PAST statistical package version 4 (Hammer *et al.* 2001).

219 **Data quality assessment and preprocessing.** Gene and apocarotenoid datasets were inspected to  
220 spot potential extreme samples or outliers. Different preprocessing approaches were tested,  
221 including autoscaling (i.e., column scaling to unit variance, followed by mean centering) and  
222 normalization to a unit area (i.e., the normalization factor of each sample was computed from its  
223 “area under the curve”) followed by mean centering. Based on the ease of interpretation, we  
224 selected the following preprocessing: mean centering alone for the apocarotenoids dataset, and  
225 autoscale for the gene dataset. All modeling results were therefore obtained from the two datasets  
226 preprocessed as such. With respect to the analysis with the low-level data fusion approach (i.e.,  
227 combining the two datasets into an individual one), a different sequence tailored to the issue of  
228 obtaining an equal representation of the two datasets was used, as described in the dedicated  
229 paragraph further in the section Data fusion approach.

230 **Exploratory analysis.** All chemometric models reported in this work are “exploratory”, meaning  
231 that they describe the phenomena and natural groupings captured in the data, in an unsupervised  
232 manner (Li Vigni *et al.* 2013). To this aim, Principal Component Analysis (PCA) (Bro & K. Smilde  
233 2014) was employed. This technique is employed to capture, in sequence, the largest sources of  
234 variability by defining new variables (the so-called “Principal Components”, PCs), which are  
235 summaries of the different pieces of information contained in the data. This “summarized” version  
236 of the information can be inspected with the scores and loadings plots, which are scatter plots  
237 obtained by plotting pairs (and sometimes triplets) of PCs. The scores plot allows inspecting the  
238 relationships among the samples and thus spotting possible groupings and tendencies or patterns of  
239 interest, while the loadings plot allows inspecting the relationships among the variables of the data,  
240 providing at the same time an interpretation of the scores plot. In our study, individual  
241 apocarotenoids and genes were identified by their systematic names and inspected in PCA as the  
242 samples. At the same time, the variables of the datasets were the combinations of three-time points  
243 (7, 21, and 35 dpi) and three conditions (MYC, no-myc -Pi, no-myc +Pi) for a total of nine  
244 combinations.

245 **Data fusion approach.** For this study we also tested a low-level data fusion approach (Borràs *et al.*  
246 2015) to combine and jointly explore the information of the apocarotenoids and genes datasets. In  
247 practice, the apocarotenoids dataset was joined with the gene dataset in the sample direction so that



248 the nine variables (combinations of time points and conditions) were coherent between the two  
249 datasets, i.e., the information described by each column had to be the same in both datasets.  
250 We performed the following data preprocessing and fusion sequence: (i) standard deviation scaling  
251 for each APO/gene quantification, (ii) fusion of the two data tables, (iii) group scale to give the two  
252 data tables the same importance (i.e., each dataset accounts for 50 % of the total variance of the  
253 resulting fused dataset), (iv) mean center. The new fused data table was then modelled with PCA,  
254 with the apocarotenoids and the genes as the samples (rows) and the combinations of time points  
255 and treatments as the variables (columns) (**Supplementary Fig.S1**).

## 256 **Results**

### 257 ***CCD* gene expression pattern during AM symbiosis**

258 We determined the transcript level of a set of *CCD* gene, including *CCD1*, *CCD4a*, *CCD4b*, *CCD7*,  
259 *CCD8*, *ZAS1*, *ZAS1b*, *ZAS1c*, and *ZAS2*, in mycorrhizal plants grown at low Pi (3.2  $\mu$ M) and in non-  
260 mycorrhizal plants grown at low (3.2  $\mu$ M) or high Pi (500  $\mu$ M). We measured the transcript levels  
261 at early (7 dpi), middle (21 dpi), and late (35 dpi) stage of AM symbiosis development  
262 (**Supplementary Fig. S2**). To assess the statistically significant differences, all samples were  
263 referred to the -Pi condition within each time point. As shown in the heatmap (**Fig. 1A**) referred to  
264 roots, *CCD1*, *CCD4a*, and *CCD4b* transcript level increased at 21 dpi in the +Pi condition  
265 compared to -Pi and MYC ones. Concerning the SL biosynthetic genes, we observed an induction  
266 of *CCD7* in MYC roots at the middle and late stage (21, 35 dpi), while *CCD8* was induced at 7 dpi  
267 under the MYC condition, and, as expected, down-regulated under +Pi condition in the later time  
268 points (at 21 and 35 dpi) (López-Ráez *et al.*, 2008; Yoneyama *et al.*, 2013). At the middle stage  
269 (21dpi), *ZAS1* showed an up-regulation in MYC samples and a down-regulation under +Pi. The  
270 *ZAS1* homolog, *ZAS1b* was upregulated at 21 dpi in MYC and +Pi roots, while we detected a down-  
271 regulation in MYC roots during the later stage. By contrast, *ZAS1c* was up-regulated at 35 dpi in  
272 MYC roots. Finally, *ZAS2* expression level increased at 21 dpi in +Pi. **Supplementary Fig. S3A.**

273 *CCDs* gene expression pattern in shoots (**Fig. 1B, Supplementary Fig. S3B**) displayed several  
274 differences compared to roots. We detected induction of *CCD1* at 21 dpi in the +Pi condition, while  
275 its expression decreased in the MYC condition at 21 and 35 dpi. *CCD4a* showed an expression  
276 profile similar to *CCD1*. By contrast, *CCD4b* displayed an opposite trend compared to *CCD4a* with  
277 an up-regulation at 35 dpi in the MYC condition. Moreover, *CCD4b* displayed an up-regulation at 7  
278 dpi in the +Pi condition. We did not observe significant changes in the *CCD7* expression level  
279 across all conditions or time points, while *CCD8* transcript level was up-regulated at 7 dpi (MYC

280 and +Pi conditions) and down-regulated in the later stages (21 and 35 dpi) in shoots of plants grown  
281 in +Pi and at 35 dpi in shoots of MYC plants. *ZAS1* displayed a down-regulation trend in all time  
282 points and conditions considered, with a statistically significant difference in mycorrhizal samples  
283 at 7 dpi. *ZAS1b*, and *ZAS1c*, showed an up-regulation in leaves of the MYC plant at the first time  
284 point (7 dpi) and 21 dpi upon +Pi. Lastly, *ZAS2* was barely detected in the shoot of plant growth at  
285 low Pi, while it showed an up-regulation at 21 dpi in MYC and +Pi conditions and a down-  
286 regulation in +Pi at 35 dpi.

287 We used PCA to assess the samples' natural grouping and clustering tendencies under the different  
288 growth conditions (MYC, -Pi, and +P) at the three-time points analyzed. The loading plot of **Fig.**  
289 **2A** describes the influence of the measured variables on the samples' distribution shown in the  
290 scores plot of **Fig. 2B** that provides insights into this distribution.

291 In our study, the PCA model was obtained from the expression level of the set of genes analyzed in  
292 all samples, in which PC1 explained 43.88% (related to the gene expression level) and PC2  
293 explained 22.23% (related to the plant developmental stage) of the total variance (**Supplementary**  
294 **Fig. S4**). PC1 and PC2 models highlight that in all growth conditions the middle developmental  
295 stage (21 dpi) presented a different *CCD* expression pattern compared to early and late stages. We  
296 selected the model with 5 PCs, since PC3 (9.90%) and PC5 (5.53%) provided notable information  
297 related to the growth conditions, as shown in the loading plot (**Fig. 2A**), while the scores plot (**Fig.**  
298 **2B**) displayed a clear separation between the plant organs: roots and shoots. More in detail, **Fig. 2B**  
299 showed that *CCD1* and *CCD7* expression in roots was mainly influenced by Pi level, while that of  
300 *CCD8* was affected by both Pi level and MYC condition. *CCD4a*, *ZAS1c*, and *ZAS1* expression was  
301 more affected by the time point than by the Pi level. By contrast, the *CCD4b* and *ZAS2* expression  
302 levels were mainly influenced by the Pi level.

303 Concerning the shoot, *CCD1*, *CCD4a*, *CCD4b*, and *ZAS2* were located in the plot area influenced  
304 by the Pi level during the middle and late stages (21 and 35 dpi), while *CCD7* and *ZAS1c* fell in the  
305 plot area related to the MYC condition.

### 306 **Apocarotenoid profile**

307 To profile non-hydroxylated and hydroxylated apocarotenoids (**Table 1**) in roots and shoots of rice  
308 plants grown in high/low Pi concentration (+Pi and -Pi) and upon MYC condition, we used the  
309 ultra-HPLC (UHPLC)-mass spectrometry (MS)-based approach to get insight into the  
310 apocarotenoid compositions (Mi *et al.*, 2018). To simplify this analysis, the statistically significant  
311 differences were referred to as the -Pi condition within each time point. The results showed a

312 substantial difference between roots and shoots in the apocarotenoid quantification and distribution,  
313 in analogy to what has been observed in *CCDs* gene expression data.

314 With respect to roots (**Fig. 3A, Supplementary Fig. S5A**), we observed an increment of the content  
315 of Apo9 ( $\beta$ -ionone), Apo10, and their hydroxylated forms (OH-Apo9 and OH-Apo10) in MYC  
316 condition at 21 dpi and 35 dpi. In addition, Apo10 showed a higher accumulation in MYC roots and  
317 upon +Pi at 7 dpi. Likewise, at the same time point, the Apo11 level increased in the MYC  
318 condition, while it decreased during the middle stage (21 dpi), contrary to its hydroxylated forms  
319 (OH-Apo 11 and OH-Apo 11-iso) that showed a strong accumulation. Moreover, at 35 dpi, all the  
320  $\beta$ -apo-11-carotenoids ( $C_{15}$ ) showed a statistically significant decrease upon +Pi. Apo12 and Apo14  
321 displayed the same pattern at 35 dpi: both showed a higher accumulation in MYC and +Pi  
322 compared to -Pi. By contrast, we observed an increase of Apo13 in MYC and +Pi conditions during  
323 the early (7 dpi) and middle stages (21 dpi); its hydroxylated forms (OH-Apo13 and OH-Apo13-  
324 iso) also displayed a higher content at 7 dpi in the +Pi condition and 21 dpi in the MYC root.  
325 Moreover, at the later stage (35 dpi), OH-Apo13-iso showed a statistically significant higher and  
326 lower content in MYC and +Pi roots respectively. Finally, Apo15 and Apo15-iso displayed a higher  
327 level at 21 dpi in MYC and +Pi roots.

328 Concerning the shoot, the heatmap (**Fig. 3B**) showed that the non-hydroxylated apocarotenoids  
329 (from Apo 8 to Apo 15) displayed an overall similar profile: a general decrease at 7 and 35 dpi in  
330 +Pi condition compared to plants grown at -Pi, and an increase upon MYC and +Pi during the  
331 middle stage (21 dpi). Notably, Apo9, Apo10, Apo11, Apo12, Apo13, Apo14 and its isomer  
332 (Apo14-iso), and Apo15 levels decreased at 7 dpi in the +Pi condition. By contrast, at 21 dpi, Apo9,  
333 Apo10, Apo11, Apo12, Apo13, and Apo15 content increased in MYC and +Pi conditions, while  
334 Apo14 and its isomer showed an increment only for the MYC condition. At the later time point (35  
335 dpi), we detected a decrease of Apo9, Apo12, and Apo14 e its isomer content in MYC plants.

336 The hydroxylated forms showed a profile similar to non-hydroxylated APO with an increased  
337 content at 21 dpi in the +Pi condition, and a decreasing trend in the MYC condition at 35 dpi. In  
338 detail, at 7 dpi, the OH-Apo11 isomer showed a statistically different increase in MYC condition.  
339 Further, at 21 dpi, OH-Apo8, OH-Apo10, OH-Apo11 and its isomer, OH-Apo12, OH-Apo13, OH-  
340 Apo15, and OH-Apo15 isomer strongly increase in +Pi. At the same time point, also OH-Apo11  
341 isomer and OH-Apo13 levels increased in the MYC condition, while the OH-Apo10 content  
342 decreased. At the later stage, OH-Apo10 and OH-Apo11 displayed an increased content at +Pi,  
343 while OH-Apo13-iso accumulation decreased in the shoot of plants grown in MYC and +Pi  
344 conditions (**Supplementary Fig. S5B**).

345 To highlight correlations in apocarotenoids distribution across different stages of plant  
346 development, AM symbiosis and Pi levels, a PCA was employed. In the apocarotenoid database, no  
347 outliers (i.e., samples with clearly inconsistent values and/or unexpected behaviors attributable to  
348 errors of measurement or to data acquisition problems) were identified, even if three apocarotenoids  
349 (OH-Apo10, Apo10, and Apo12) showed very high values across all time points and treatments  
350 (**Supplementary Fig. S6**). To better model the information of the rest of the samples, these three  
351 extreme samples were removed from the apocarotenoid dataset and projected at a later stage to  
352 inspect their position in the final PCA model.

353 In the PCA model referred to apocarotenoids, PC1 explained 43.88% (related to apocarotenoid  
354 quantification) and PC2 explained 22.23% (related to growth conditions) of the total variance  
355 (**Supplementary Fig. S7**). PC1 and PC2 models highlighted the apocarotenoids strictly related to  
356 MYC condition (OH-Apo9; Apo11; OH-Apo11; OH-Apo13iso). Further, we adopted the PCA  
357 model PC2 combined with PC3, where PC3 explained 2.55% of the total variation, upon the  
358 propensity of samples to regroup following the temporal trend described in the loading plot (**Fig.**  
359 **4A**).

360 In the plot chart, at 7 dpi all the growth conditions were clustered in the same area. Here, the  
361 majority of the analyzed shoot apocarotenoids (Apo9, Apo11, OH-Apo11 isomer, OH-Apo13, OH-  
362 Apo13 isomer, and Apo15) were located, suggesting that their content was mainly influenced by the  
363 growth time than by the growth condition.

364 The scores plot (**Fig. 4B**) displayed a clear separation between the apocarotenoids quantified in  
365 roots or shoots. In-depth, in root OH-Apo9, OH-Apo11, Apo11, and OH-Apo13 isomer were  
366 mainly influenced by mycorrhization in different time points (21 dpi and 35 dpi). Instead, APO14  
367 seems to be dependent on the Pi level and MYC condition. However, in shoot OH-Apo9, OH-  
368 Apo12, and OH-Apo15 were linked to the +Pi condition. OH-Apo8, the OH-Apo12 isomer, and the  
369 OH-Apo15 isomer depended on the Pi level at the middle stage (21 dpi).

## 370 **Data fusion**

371 Finally, to combine and investigate the potential correlation between apocarotenoids and CCD  
372 genes, we used a low-level data fusion approach (Borràs *et al.*, 2015) to combine the two datasets  
373 into an individual fused one, also modelled with PCA.

374 In the resulting PCA model, considering genes expression and apocarotenoids profiles joined, PC1  
375 explained 29.65% and PC2 explained 26.81% of the total variance (**Fig. 5A, Fig. 5B**). From the  
376 loading plot (**Fig. 5A**) we observed the grouping of the samples interpretable by the temporal trend  
377 (7, 21, and 35 dpi). As reported for the previous scores plots referred to individual categories (genes

378 and apocarotenoids), in **Figure 5B** we observed a clear separation between plant organs. In more  
379 detail, genes and apocarotenoids in the left upper part of the scores plot (**Fig. 5B**) were more related  
380 to the early stage (7 dpi). Here, we found mainly shoot apocarotenoids, *CCD8* expressed in both  
381 root and shoot, and *ZAS1c* in the root. By contrast, the lower left part of the plot, clustered  
382 exclusively apocarotenoids and genes (*CCD7* and *ZAS1*) modulated in the root, depended on the  
383 MYC condition during the middle and later stages. In particular, Apo9 ( $\beta$ -ionone), Apo10, and their  
384 hydroxylated forms (OH-Apo9 and OH-Apo10) were grouped in this plot area, suggesting their  
385 possible involvement during the AM colonization process. Furthermore, in the same area, we  
386 highlighted the association between *CCD7* and one of its cleavage products, Apo9 ( $\beta$ -ionone). In  
387 addition, this group highlighted the correlation between *ZAS1*, responsible for the OH-Apo13  
388 (zaxinone) synthesis, and its precursors (OH-Apo10 and OH-Apo12).  
389 In the shoot, most of the *CCD* genes (*CCD1*, *CCD4a*, *CCD7*, *ZAS1b*, *ZAS1c*, and *ZAS2*) were  
390 mainly influenced by the Pi level and by the growing time (21 dpi and 35 dpi) similarly to some  
391 genes (*CCD1*, *CCD4a*, *CCD4b*, and *ZAS2*) in the root. Moreover, the right area of the plot clustered  
392 the majority of shoot apocarotenoids. On the whole, apocarotenoids profiles in the shoot seem to be  
393 more influenced by the time points (7, 21, 35 dpi) and Pi availability, while, in the root, most  
394 apocarotenoids and genes were mainly influenced by mycorrhization.

## 395 Discussion

396 In recent years, plant apocarotenoids are emerging not only as carotenoid breakdown products but  
397 as metabolites with active roles in regulating physiological and developmental processes and plant-  
398 (a)biotic interactions (Zheng *et al.*, 2021). In particular, some apocarotenoids were associated with  
399 the establishment and maintenance of AM symbiosis (Fiorilli *et al.*, 2019). Investigations over the  
400 last decade indicate that beyond SLs, ABA, mycorradicins, and blumenols (Walter *et al.*, 2007;  
401 Floss *et al.*, 2008; Hill *et al.*, 2018; Wang *et al.*, 2018; Fiorilli *et al.*, 2019), other apocarotenoids  
402 may play a role in this mutualistic association. For example, zaxinone, generated by the activity of  
403 the CCD subfamily Zaxinone Synthases, was shown to control the extent of AM root colonization  
404 with a complex interplay with SLs (Votta *et al.*, 2022; Ablazov *et al.*, 2023). To further explore the  
405 involvement of other apocarotenoids in the AM symbiosis in this work we developed a combined  
406 approach: we profiled apocarotenoids in rice roots and shoots across a time course (7, 21, and 35  
407 dpi) experiment of AM colonization by LC-MS (Mi *et al.*, 2018) and, in parallel, we monitored the  
408 expression pattern of a set of CCD genes. To highlight genes and apocarotenoids more specifically  
409 related to the AM association, we analyzed plants grown in low and high Pi conditions. Our results  
410 show that the AM colonization, although confined to the root system, can trigger a systemic



411 response which is evident from the modulation of *CCDs* gene expression and apocarotenoid content  
412 in rice shoots. The effect on epigeous organs exerted by AM root colonization has been already  
413 described in other species (Fiorilli *et al.*, 2009, 2018; Zouari *et al.*, 2014). In addition, our analysis  
414 indicates that both mycorrhization and Pi availability triggered an organ-specific response with  
415 differential modulation of genes and apocarotenoids in roots *versus* shoots (**Fig. 3, Fig. 4**).

416 In particular, in roots Apo9, OH-Apo9, Apo10 and OH-Apo10 are much more abundant in the  
417 MYC samples across almost all the time points analyzed and do not accumulate under +Pi, which  
418 suggests that they may be important for the AM colonization process. Apo9 is  $\beta$ -ionone, a cleavage  
419 product of several CCD enzymes (CCD1, CCD4, and CCD7) which was shown to have a role in  
420 plant-fungal interactions (Wilson *et al.*, 1981; Sharma *et al.*, 2012). However, its specific  
421 involvement in the AM symbiosis has not been characterized yet. As in our dataset, CCD7 displays  
422 an AM-responsive expression profile and it is involved in SLs biosynthesis, we envisage that  $\beta$ -  
423 ionone accumulation in AM roots is mainly due to CCD7 activity. It is worth noting that CCD7  
424 could also be involved in the synthesis of blumenol-type metabolites and mycorradicin that  
425 accumulate in roots in the late stage of AM colonization (Wang *et al.*, 2018; Fiorilli *et al.*, 2019);  
426 we can also hypothesize that  $\beta$ -ionone is a precursor of blumenols. However, due to lack of  
427 authentic standards, we were not able to monitor blumenol derivatives.

428 Interestingly, we observed the accumulation at the middle and late stages of mycorrhization of  
429 zaxinone and OH-Apo10, which is the precursor of zaxinone, indicating that mycorrhization  
430 stimulates multiple steps of this branch of the apocarotenoid biochemical pathway. Notably, the  
431 expression of *ZAS1* (and partially *ZAS2*) was also highly influenced by the MYC condition in roots,  
432 confirming its correlation with zaxinone (**Fig. 1, Fig. 5**). The association between *CCD8* and *ZAS1*  
433 at 7 dpi is in line with previous data showing their interplay at the early stage of the AM symbiosis  
434 (Votta *et al.*, 2022).

435 Apo11 level increased at 7 dpi and decreased at 21 dpi, while OH-Apo11 and OH-Apo11 isomers  
436 could be associated with the 21 dpi MYC condition. Importantly, the apocarotenoids Apo11 and  
437 OH-Apo11 were recently described as being part of an alternative zeaxanthin epoxidase-  
438 independent pathway to produce ABA (Jia *et al.*, 2022). Moreover, these compounds act like ABA  
439 in maintaining seed dormancy and inducing the expression of ABA-responsive genes (Zheng *et al.*,  
440 2021; Jia *et al.*, 2022). In light of these findings, we could hypothesize that Apo11 and OH-Apo11,  
441 could be involved in the AM symbiosis, and deserve more investigations along the whole  
442 colonization process and in relation to what has been already described for ABA in mycorrhizal  
443 roots (López-Ráez *et al.*, 2010; Pozo *et al.*, 2015).



444 The composition of shoot apocarotenoids seems to be most influenced by the time point considered.  
445 At 7 dpi, we observe a trend to a decrease of most apocarotenoids, especially in the +Pi compared  
446 to -Pi condition. At 21 dpi, the MYC and +Pi conditions showed a similar pattern with a general  
447 increase in the level of several apocarotenoids. At 35 dpi, MYC and +Pi conditions again displayed  
448 a similar profile, but with a general decrease of several apocarotenoids content. From these  
449 observations, it can be speculated that the similarity between the MYC and the +Pi conditions could  
450 mirror the Pi nutritional status since the AM symbiosis guarantees an improved Pi mineral nutrition  
451 mimicking the high Pi condition (Zouari *et al.*, 2014). Moreover, our data indicate that the OH-  
452 Apo11 isomer deserves more investigation as it could be considered a shoot marker of the early  
453 stage of AM colonization.

454 We also attempted to associate the expression of specific genes with the accumulation of specific  
455 apocarotenoids with a data fusion approach as the genes involved in the production of many  
456 apocarotenoids are largely unknown. The reliability of the approach was confirmed by the  
457 association between *ZASI* and zaxinone and its precursor in roots and by the correlation between  
458 *CCD7* and  $\beta$ -ionone (**Fig. 5**). In this context, we can speculate that *CCD1* and *CCD4a* are linked to  
459 the production of OH-Apo15 and its isomer, since they are correlated in the shoot and both organs,  
460 respectively (**Fig. 5**). Interestingly, a fungal *CCD*, *NosACO*, mediates Apo15 (retinal) production  
461 (Scherzinger *et al.*, 2006), indicating that *CCD1/4*, or still unidentified *CCDs*, are involved in  
462 Apo15 formation during the AM symbiosis. In addition, the expression of *ZASI* in shoots is also  
463 related to the accumulation of zaxinone, suggesting a direct involvement of this enzyme in  
464 endogenous zaxinone level in shoots.

465 In conclusion, our data show the specific profiles of *CCD* genes and apocarotenoids across different  
466 stages of the AM symbiosis and Pi conditions, possibly highlighting novel markers at both local and  
467 systemic levels. Moreover, this combined approach is a promising tool to further dissect this  
468 complex metabolic pathway, suggesting putative links between enzymatic activities and  
469 apocarotenoid production.

## 470 **Supplementary data**

471 *Table S1.* List of primers used in this study.

472 *Fig. S1.* Data-fusion setup.

473 *Fig. S2.* Mycorrhization level in rice mycorrhizal plants across a time course (7, 21, and 35 dpi).

474 *Fig. S3.* qRT-PCR analysis of transcript levels of CCDs genes in rice root and shoot.

475 *Fig. S4.* Principal component analysis (PC1/PC2) of root and shoot CCDs genes across the three  
476 growth stages and conditions used in this study.

477 *Fig. S5.* Apocarotenoids quantification across the three time points and the three analyzed  
478 conditions.

479 *Fig. S6.* Plot of the raw apocarotenoids dataset, including the extreme values.

480 *Fig. S7.* Principal component analysis (PC1/PC2) of root and shoot apocarotenoids across the three  
481 growth stages and conditions used in this study.

## 482 **Acknowledgements**

483 This work was supported by Baseline Funding and Competitive Research Grant (CRG2020) from  
484 King Abdullah University of Science and Technology given to SA-B. The authors would like to  
485 thank Jorge Gomez-Ariza for sharing the drawing of fugal structures present in Figure 1 and Figure  
486 3.

## 487 **Author contributions**

488 VF, SA-B, and LL designed and coordinated the investigation. CV and JYW performed the gene  
489 expression profiles and carried out the quantification of apocarotenoids with the help from KIL. NC  
490 and FS performed the PCA analysis. All authors contributed to the results and discussion. CV, VF,  
491 SA-B and LL wrote the article and all the authors contributed to manuscript review & editing.

## 492 **Conflict of interest**

493 No conflict of interest declared.

## 494 **Funding**

495 This work was supported by baseline funding of the University of Turin (LL and VF) and the  
496 Competitive Research Grant (CRG2017) given to SA-B and LL from King Abdullah University of  
497 Science and Technology.

498

499 **Data availability**

500 The data supporting the findings of this study are available within the paper and within its  
501 supplementary data published online.

## 502 **References**

- 503 **Ablazov A, Mi J, Jamil M, Jia K-P, Wang JY, Feng Q, Al-Babili S.** 2020. The apocarotenoid  
504 zaxinone is a positive regulator of strigolactone and abscisic acid biosynthesis in  
505 *Arabidopsis* roots. *Frontiers in Plant Science* **11**, 578.
- 506 **Ablazov A, Votta C, Fiorilli V, et al.** 2023. ZAXINONE SYNTHASE 2 regulates growth and  
507 arbuscular mycorrhizal symbiosis in rice. *Plant Physiology* **191**, 382–399.
- 508 **Ahrazem O, Gómez-Gómez L, Rodrigo MJ, Avalos J, Limón MC.** 2016. Carotenoid cleavage  
509 oxygenases from microbes and photosynthetic organisms: features and functions.  
510 *International Journal of Molecular Sciences* **17**, 1781.
- 511 **Alder A, Jamil M, Marzorati M, Bruno M, Vermathen M, Bigler P, Ghisla S, Bouwmeester H,**  
512 **Beyer P, Al-Babili S.** 2012. The path from  $\beta$ -carotene to carlactone, a strigolactone-like  
513 plant hormone. *Science* **335**, 1348–1351.
- 514 **Auldridge ME, McCarty DR, Klee HJ.** 2006. Plant carotenoid cleavage oxygenases and their  
515 apocarotenoid products. *Current Opinion in Plant Biology* **9**, 315–321.
- 516 **Bonfante P, Requena N.** 2011. Dating in the dark: how roots respond to fungal signals to establish  
517 arbuscular mycorrhizal symbiosis. *Current Opinion in Plant Biology* **14**, 451–457.
- 518 **Borràs E, Ferré J, Boqué R, Mestres M, Aceña L, Busto O.** 2015. Data fusion methodologies for  
519 food and beverage authentication and quality assessment A review. *Analytica Chimica Acta*  
520 **891**, 1–14.
- 521 **Bro R, K. Smilde A.** 2014. Principal component analysis. *Analytical Methods* **6**, 2812–2831.
- 522 **Brundrett MC.** 2009. Mycorrhizal associations and other means of nutrition of vascular plants:  
523 understanding the global diversity of host plants by resolving conflicting information and  
524 developing reliable means of diagnosis. *Plant and Soil* **320**, 37–77.
- 525 **Bruno M, Beyer P, Al-Babili S.** 2015. The potato carotenoid cleavage dioxygenase 4 catalyzes a  
526 single cleavage of  $\beta$ -ionone ring-containing carotenes and non-epoxidated xanthophylls.  
527 *Archives of Biochemistry and Biophysics* **572**, 126–133.

- 528 **Bruno M, Koschmieder J, Wuest F, Schaub P, Fehling-Kaschek M, Timmer J, Beyer P, Al-**  
529 **Babili S.** 2016. Enzymatic study on AtCCD4 and AtCCD7 and their potential to form  
530 acyclic regulatory metabolites. *Journal of Experimental Botany* **67**, 5993–6005.
- 531 **Carbonnel S, Gutjahr C.** 2014. Control of arbuscular mycorrhiza development by nutrient signals.  
532 *Frontiers in Plant Science* **5**.
- 533 **Cazzonelli CI.** 2011. Carotenoids in nature: insights from plants and beyond. *Functional Plant*  
534 *Biology* **38**, 833.
- 535 **Charpentier M, Sun J, Wen J, Mysore KS, Oldroyd GED.** 2014. Abscisic acid promotion of  
536 arbuscular mycorrhizal colonization requires a component of the PROTEIN  
537 PHOSPHATASE 2A complex. *Plant Physiology* **166**, 2077–2090.
- 538 **Chen M, Arato M, Borghi L, Nouri E, Reinhardt D.** 2018. Beneficial services of arbuscular  
539 mycorrhizal fungi from ecology to application. *Frontiers in Plant Science* **9**, 1270.
- 540 **Chen G-TE, Wang JY, Jamil M, Braguy J, Al-Babili S.** 2022. 9-cis- $\beta$ -Apo-10'-carotenal is the  
541 precursor of strigolactones in planta. *Planta* **256**, 88.
- 542 **Das D, Paries M, Hobecker K, Gigl M, Dawid C, Lam H-M, Zhang J, Chen M, Gutjahr C.**  
543 2022. PHOSPHATE STARVATION RESPONSE transcription factors enable arbuscular  
544 mycorrhiza symbiosis. *Nature Communications* **13**, 477.
- 545 **Felemban A, Braguy J, Zurbriggen MD, Al-Babili S.** 2019. Apocarotenoids involved in plant  
546 development and stress response. *Frontiers in Plant Science* **10**, 1168.
- 547 **Fester T, Schmidt D, Lohse S, Walter M, Giuliano G, Bramley P, Fraser P, Hause B, Strack**  
548 **D.** 2002. Stimulation of carotenoid metabolism in arbuscular mycorrhizal roots. *Planta* **216**,  
549 148–154.
- 550 **Fiorilli V, Catoni M, Miozzi L, Novero M, Accotto GP, Lanfranco L.** 2009. Global and cell-type  
551 gene expression profiles in tomato plants colonized by an arbuscular mycorrhizal fungus.  
552 *The New Phytologist* **184**, 975–987.
- 553 **Fiorilli V, Vannini C, Ortolani F, et al.** 2018. Omics approaches revealed how arbuscular  
554 mycorrhizal symbiosis enhances yield and resistance to leaf pathogen in wheat. *Scientific*  
555 *Reports* **8**, 9625.

- 556 **Fiorilli V, Wang JY, Bonfante P, Lanfranco L, Al-Babili S.** 2019. Apocarotenoids: old and new  
557 mediators of the arbuscular mycorrhizal symbiosis. *Frontiers in Plant Science* **10**, 1186.
- 558 **Floß DS, Hause B, Lange PR, Küster H, Strack D, Walter MH.** 2008. Knock-down of the MEP  
559 pathway isogene 1-deoxy-d-xylulose 5-phosphate synthase 2 inhibits formation of  
560 arbuscular mycorrhiza-induced apocarotenoids, and abolishes normal expression of  
561 mycorrhiza-specific plant marker genes. *The Plant Journal* **56**, 86–100.
- 562 **Floss DS, Levy JG, Levesque-Tremblay V, Pumplin N, Harrison MJ.** 2013. DELLA proteins  
563 regulate arbuscule formation in arbuscular mycorrhizal symbiosis. *Proceedings of the*  
564 *National Academy of Sciences* **110**, E5025–E5034.
- 565 **Floss DS, Schliemann W, Schmidt J, Strack D, Walter MH.** 2008. RNA interference-mediated  
566 repression of MtCCD1 in mycorrhizal roots of *Medicago truncatula* causes accumulation of  
567 C27 apocarotenoids, shedding light on the functional role of CCD1. *Plant Physiology* **148**,  
568 1267–1282.
- 569 **Güimil S, Chang H-S, Zhu T, et al.** 2005. Comparative transcriptomics of rice reveals an ancient  
570 pattern of response to microbial colonization. *Proceedings of the National Academy of*  
571 *Sciences* **102**, 8066–8070.
- 572 **Gutjahr C.** 2014. Phytohormone signaling in arbuscular mycorrhiza development. *Current Opinion*  
573 *in Plant Biology* **20**, 26–34.
- 574 **Gutjahr C, Parniske M.** 2013. Cell and developmental biology of arbuscular mycorrhiza  
575 symbiosis. *Annual Review of Cell and Developmental Biology* **29**, 593–617.
- 576 **Haider I, Yunmeng Z, White F, et al.** 2023. Transcriptome analysis of the phosphate starvation  
577 response sheds light on strigolactone biosynthesis in rice. *The Plant Journal*, published  
578 online ahead of print.
- 579 **Hammer O, Harper DAT, Ryan PD.** 2001. PAST: Paleontological statistics software package for  
580 education and data analysis. *Palaeontologia Electronica*, **4**, 9.
- 581 **Harrison MJ.** 2012. Cellular programs for arbuscular mycorrhizal symbiosis. *Current Opinion in*  
582 *Plant Biology* **15**, 691–698.



- 583 **Harrison PJ, Bugg TDH.** 2014. Enzymology of the carotenoid cleavage dioxygenases: Reaction  
584 mechanisms, inhibition and biochemical roles. *Archives of Biochemistry and Biophysics*  
585 **544**, 105–111.
- 586 **Herrera-Medina MJ, Steinkellner S, Vierheilig H, Ocampo Bote JA, García Garrido JM.**  
587 2007. Abscisic acid determines arbuscule development and functionality in the tomato  
588 arbuscular mycorrhiza. *New Phytologist* **175**, 554–564.
- 589 **Hill EM, Robinson LA, Abdul-Sada A, Vanbergen AJ, Hodge A, Hartley SE.** 2018. Arbuscular  
590 mycorrhizal fungi and plant chemical defence: effects of colonisation on aboveground and  
591 belowground metabolomes. *Journal of Chemical Ecology* **44**, 198–208.
- 592 **Hou X, Rivers J, León P, McQuinn RP, Pogson BJ.** 2016. synthesis and function of  
593 apocarotenoid signals in plants. *Trends in Plant Science* **21**, 792–803.
- 594 **Huang F-C, Molnár P, Schwab W.** 2009. Cloning and functional characterization of carotenoid  
595 cleavage dioxygenase 4 genes. *Journal of Experimental Botany* **60**, 3011–3022.
- 596 **Ilg A, Beyer P, Al-Babili S.** 2009. Characterization of the rice carotenoid cleavage dioxygenase 1  
597 reveals a novel route for geranial biosynthesis: A novel route for geranial formation. *FEBS*  
598 *Journal* **276**, 736–747.
- 599 **Ilg A, Bruno M, Beyer P, Al-Babili S.** 2014. Tomato carotenoid cleavage dioxygenases 1A and  
600 1B: Relaxed double bond specificity leads to a plenitude of dialdehydes, mono-  
601 apocarotenoids and isoprenoid volatiles. *FEBS Open Bio* **4**, 584–593.
- 602 **Jia K-P, Baz L, Al-Babili S.** 2018. From carotenoids to strigolactones. *Journal of Experimental*  
603 *Botany* **69**, 2189–2204.
- 604 **Jia K-P, Mi J, Ali S, et al.** 2022. An alternative, zeaxanthin epoxidase-independent abscisic acid  
605 biosynthetic pathway in plants. *Molecular Plant* **15**, 151–166.
- 606 **Klingner A, Bothe H, Wray V, Marnier F-J.** 1995. Identification of a yellow pigment formed in  
607 maize roots upon mycorrhizal colonization. *Phytochemistry* **38**, 53–55.
- 608 **Li Vigni M, Durante C, Cocchi M.** 2013. Chapter 3 Exploratory Data Analysis. In: Marini F, ed.  
609 *Chemometrics in Food Chemistry. Data Handling in Science and Technology.* Elsevier, 55–  
610 126.

- 611 **López-Ráez JA, Charnikhova T, Gómez-Roldán V, et al.** 2008. Tomato strigolactones are  
612 derived from carotenoids and their biosynthesis is promoted by phosphate starvation. *New*  
613 *Phytologist* **178**, 863–874.
- 614 **López-Ráez JA, Kohlen W, Charnikhova T, et al.** 2010. Does abscisic acid affect strigolactone  
615 biosynthesis? *New Phytologist* **187**, 343–354.
- 616 **Ma G, Zhang L, Matsuta A, Matsutani K, Yamawaki K, Yahata M, Wahyudi A, Motohashi**  
617 **R, Kato M.** 2013. Enzymatic Formation of  $\beta$ -Citraurin from  $\beta$ -Cryptoxanthin and  
618 Zeaxanthin by Carotenoid Cleavage Dioxygenase4 in the Flavedo of Citrus Fruit. *Plant*  
619 *Physiology* **163**, 682–695.
- 620 **MacLean AM, Bravo A, Harrison MJ.** 2017. Plant signaling and metabolic pathways enabling  
621 arbuscular mycorrhizal symbiosis. *The Plant Cell* **29**, 2319–2335.
- 622 **Maier W, Hammer K, Dammann U, Schulz B, Strack D.** 1997. Accumulation of sesquiterpenoid  
623 cyclohexenone derivatives induced by an arbuscular mycorrhizal fungus in members of the  
624 Poaceae. *Planta* **202**, 36–42.
- 625 **Martín-Rodríguez JA, Huertas R, Ho-Plágaro T, Ocampo JA, Turečková V, Tarkowská D,**  
626 **Ludwig-Müller J, García-Garrido JM.** 2016. Gibberellin–abscisic acid balances during  
627 arbuscular mycorrhiza formation in tomato. *Frontiers in Plant Science* **7**, 1273.
- 628 **Martín-Rodríguez JÁ, León-Morcillo R, Vierheilig H, Ocampo JA, Ludwig-Müller J, García-**  
629 **Garrido JM.** 2011. Ethylene-dependent/ethylene-independent ABA regulation of tomato  
630 plants colonized by arbuscular mycorrhiza fungi. *New Phytologist* **190**, 193–205.
- 631 **McQuinn RP, Giovannoni JJ, Pogson BJ.** 2015. More than meets the eye: from carotenoid  
632 biosynthesis, to new insights into apocarotenoid signaling. *Current Opinion in Plant Biology*  
633 **27**, 172–179.
- 634 **Mi J, Al-Babili S.** 2019. To color or to decolor: that is the question. *Molecular Plant* **12**, 1173–  
635 1175.
- 636 **Mi J, Jia K-P, Wang JY, Al-Babili S.** 2018. A rapid LC-MS method for qualitative and  
637 quantitative profiling of plant apocarotenoids. *Analytica Chimica Acta* **1035**, 87–95.

- 638 **Moise AR, Al-Babili S, Wurtzel ET.** 2014. Mechanistic aspects of carotenoid biosynthesis.  
639 *Chemical Reviews* **114**, 164–193.
- 640 **Moreno JC, Mi J, Alagoz Y, Al-Babili S.** 2021. Plant apocarotenoids: from retrograde signaling  
641 to interspecific communication. *The Plant Journal* **105**, 351–375.
- 642 **Müller LM, Harrison MJ.** 2019. Phytohormones, miRNAs, and peptide signals integrate plant  
643 phosphorus status with arbuscular mycorrhizal symbiosis. *Current Opinion in Plant Biology*  
644 **50**, 132–139.
- 645 **Nadal M, Paszkowski U.** 2013. Polyphony in the rhizosphere: presymbiotic communication in  
646 arbuscular mycorrhizal symbiosis. *Current Opinion in Plant Biology* **16**, 473–479.
- 647 **Nambara E, Marion-Poll A.** 2005. Abscisic acid biosynthesis and catabolism. *Annual Review of*  
648 *Plant Biology* **56**, 165–185.
- 649 **Nisar N, Li L, Lu S, Khin NC, Pogson BJ.** 2015. Carotenoid metabolism in plants. *Molecular*  
650 *Plant* **8**, 68–82.
- 651 **Pozo MJ, Jung SC, López-Ráez JA, Azcón-Aguilar C.** 2010. Impact of Arbuscular Mycorrhizal  
652 Symbiosis on Plant Response to Biotic Stress: The Role of Plant Defence Mechanisms. In:  
653 Koltai H., In: Kapulnik Y, eds. *Arbuscular Mycorrhizas: Physiology and Function*.  
654 Dordrecht: Springer Netherlands, 193–207.
- 655 **Pozo MJ, López-Ráez JA, Azcón-Aguilar C, García-Garrido JM.** 2015. Phytohormones as  
656 integrators of environmental signals in the regulation of mycorrhizal symbioses. *New*  
657 *Phytologist* **205**, 1431–1436.
- 658 **Richardson AE, Lynch JP, Ryan PR, et al.** 2011. Plant and microbial strategies to improve the  
659 phosphorus efficiency of agriculture. *Plant and Soil* **349**, 121–156.
- 660 **Rodrigo MJ, Alquézar B, Alós E, Medina V, Carmona L, Bruno M, Al-Babili S, Zacarías L.**  
661 2013. A novel carotenoid cleavage activity involved in the biosynthesis of *Citrus* fruit-  
662 specific apocarotenoid pigments. *Journal of Experimental Botany* **64**, 4461–4478.
- 663 **Scannerini S, Bonfante-Fasolo P.** 1977. Unusual plasties in an endomycorrhizal root. *Canadian*  
664 *Journal of Botany* **55**, 2471–2474.

- 665 **Scherzinger D, Ruch S, Kloer DP, Wilde A, Al-Babili S.** 2006. Retinal is formed from apo-  
666 carotenoids in *Nostoc* sp. PCC7120: *in vitro* characterization of an apo-carotenoid  
667 oxygenase. *Biochemical Journal* **15**;398(3):361-9.
- 668 **Schwartz SH, Qin X, Zeevaart JD.** 2001. Characterization of a novel carotenoid cleavage  
669 dioxygenase from plants. *Journal of Biological Chemistry* **276**, 25208–25211.
- 670 **Sharma V, Singh G, Kaur H, Saxena AK, Ishar MPS.** 2012. Synthesis of  $\beta$ -ionone derived  
671 chalcones as potent antimicrobial agents. *Bioorganic & Medicinal Chemistry Letters* **22**,  
672 6343–6346.
- 673 **Shi J, Zhao B, Zheng S, et al.** 2021. A phosphate starvation response-centered network regulates  
674 mycorrhizal symbiosis. *Cell* **184**, 5527-5540.e18.
- 675 **Smith SE, Jakobsen I, Grønlund M, Smith FA.** 2011. Roles of arbuscular mycorrhizas in plant  
676 phosphorus nutrition: interactions between pathways of phosphorus uptake in arbuscular  
677 mycorrhizal roots have important implications for understanding and manipulating plant  
678 phosphorus acquisition. *Plant Physiology* **156**, 1050–1057.
- 679 **Spatafora JW, Chang Y, Benny GL, et al.** 2016. A phylum-level phylogenetic classification of  
680 zygomycete fungi based on genome-scale data. *Mycologia* **108**, 1028–1046.
- 681 **Strack D, Fester T.** 2006. Isoprenoid metabolism and plastid reorganization in arbuscular  
682 mycorrhizal roots. *New Phytologist* **172**, 22–34.
- 683 **Sui X, Kiser PD, Lintig J von, Palczewski K.** 2013. Structural basis of carotenoid cleavage: From  
684 bacteria to mammals. *Archives of Biochemistry and Biophysics* **539**, 203–213.
- 685 **Tan B-C, Joseph LM, Deng W-T, Liu L, Li Q-B, Cline K, McCarty DR.** 2003. Molecular  
686 characterization of the *Arabidopsis* 9-*cis* epoxy-carotenoid dioxygenase gene family. *The*  
687 *Plant Journal: For Cell and Molecular Biology* **35**, 44–56.
- 688 **Vogel JT, Tan B-C, McCarty DR, Klee HJ.** 2008. The carotenoid cleavage dioxygenase 1  
689 enzyme has broad substrate specificity, cleaving multiple carotenoids at two different bond  
690 positions. *Journal of Biological Chemistry* **283**, 11364–11373.
- 691 **Volpe V, Chialva M, Mazzarella T, Crosino A, Capitano S, Costamagna L, Kohlen W, Genre**  
692 **A.** Long-lasting impact of chitoooligosaccharide application on strigolactone biosynthesis

- 693 and fungal accommodation promotes arbuscular mycorrhiza in *Medicago truncatula*. New  
694 Phytologist **237**:2316–2331.
- 695 **Votta C, Fiorilli V, Haider I, et al.** 2022. Zaxinone synthase controls arbuscular mycorrhizal  
696 colonization level in rice. The Plant Journal **111**, 1688–1700.
- 697 **Walter MH, Fester T, Strack D.** 2000. Arbuscular mycorrhizal fungi induce the non-mevalonate  
698 methylerythritol phosphate pathway of isoprenoid biosynthesis correlated with accumulation  
699 of the ‘yellow pigment’ and other apocarotenoids: Mycorrhizal induction of isoprenoid  
700 biosynthesis. The Plant Journal **21**, 571–578.
- 701 **Walter MH, Floß DS, Hans J, Fester T, Strack D.** 2007. Apocarotenoid biosynthesis in  
702 arbuscular mycorrhizal roots: Contributions from methylerythritol phosphate pathway  
703 isogenes and tools for its manipulation. Phytochemistry **68**, 130–138.
- 704 **Walter MH, Floss DS, Strack D.** 2010. Apocarotenoids: hormones, mycorrhizal metabolites and  
705 aroma volatiles. Planta **232**, 1–17.
- 706 **Wang JY, Chen G-TE, Jamil M, Braguy J, Sioud S, Liew KX, Balakrishna A, Al-Babili S.**  
707 2022. Protocol for characterizing strigolactones released by plant roots. STAR Protocols **3**,  
708 101352.
- 709 **Wang JY, Haider I, Jamil M, et al.** 2019. The apocarotenoid metabolite zaxinone regulates  
710 growth and strigolactone biosynthesis in rice. Nature Communications **10**, 810.
- 711 **Wang JY, Lin P-Y, Al-Babili S.** 2021. On the biosynthesis and evolution of apocarotenoid plant  
712 growth regulators. Seminars in Cell & Developmental Biology **109**, 3–11.
- 713 **Wang B, Qiu Y-L.** 2006. Phylogenetic distribution and evolution of mycorrhizas in land plants.  
714 Mycorrhiza **16**, 299–363.
- 715 **Wang W, Shi J, Xie Q, Jiang Y, Yu N, Wang E.** 2017. Nutrient exchange and regulation in  
716 arbuscular mycorrhizal symbiosis. Molecular Plant **10**, 1147–1158.
- 717 **Wang Y, Wang M, Li Y, Wu A, Huang J.** 2018. Effects of arbuscular mycorrhizal fungi on  
718 growth and nitrogen uptake of *Chrysanthemum morifolium* under salt stress (L-SP Tran,  
719 Ed.). PLOS ONE **13**, e0196408.

- 720 **Waters MT, Gutjahr C, Bennett T, Nelson DC.** 2017. Strigolactone *Signaling and Evolution*.  
721 Annual Review of Plant Biology **68**, 291–322.
- 722 **Wilson DM, Gueldner RC, Mckinney JK, Lievsay RH, Evans BD, Hill RA.** 1981. Effect of  $\beta$ -  
723 lonone on *Aspergillus flavus* and *Aspergillus parasiticus* growth, sporulation, morphology  
724 and aflatoxin production. Journal of the American Oil Chemists' Society **58**, A959–A961.
- 725 **Yoneyama K, Kisugi T, Xie X, Yoneyama K.** 2013. Chemistry of strigolactones: why and how do  
726 plants produce so many strigolactones? Molecular Microbial Ecology of the Rhizosphere.  
727 John Wiley & Sons, Ltd, 373–379.
- 728 **Yoneyama K, Xie X, Kusumoto D, Sekimoto H, Sugimoto Y, Takeuchi Y, Yoneyama K.** 2007.  
729 Nitrogen deficiency as well as phosphorus deficiency in sorghum promotes the production  
730 and exudation of 5-deoxystrigol, the host recognition signal for arbuscular mycorrhizal  
731 fungi and root parasites. Planta **227**, 125–132.
- 732 **Zheng X, Mi J, Balakrishna A, Liew KX, Ablazov A, Sougrat R, Al-Babili S.** 2022. *Gardenia*  
733 carotenoid cleavage dioxygenase 4a is an efficient tool for biotechnological production of  
734 crocins in green and non-green plant tissues. Plant Biotechnology Journal **20**, 2202–2216.
- 735 **Zheng X, Yang Y, Al-Babili S.** 2021. Exploring the diversity and regulation of apocarotenoid  
736 metabolic pathways in plants. Frontiers in Plant Science **12**, 787049.
- 737 **Zouari I, Salvioli A, Chialva M, Novero M, Miozzi L, Tenore GC, Bagnaresi P, Bonfante P.**  
738 2014. From root to fruit: RNA-Seq analysis shows that arbuscular mycorrhizal symbiosis  
739 may affect tomato fruit metabolism. BMC Genomics **15**, 221.



740 **Tables**

741 Table 1. A summary with non-hydroxylated and hydroxylated apocarotenoids analyzed in this

742 study, the formula, corresponding name, and structural formula are indicated for each abbreviation.

| Abbreviation   | Name                                                     | Formula           | Structural formula                                                                   |
|----------------|----------------------------------------------------------|-------------------|--------------------------------------------------------------------------------------|
| <b>Apo9</b>    | $\beta$ -apo-9'-carotenal<br>( $\beta$ -ionone)          | $C_{13}H_{20}O$   | 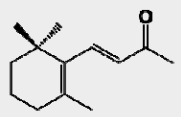   |
| <b>Apo10</b>   | $\beta$ -apo-10'-carotenal                               | $C_{27}H_{36}O$   |    |
| <b>Apo11</b>   | $\beta$ -apo-11-carotenal                                | $C_{15}H_{22}O$   |    |
| <b>Apo12</b>   | $\beta$ -apo-12'-carotenal                               | $C_{25}H_{34}O$   |   |
| <b>Apo13</b>   | $\beta$ -apo-13-carotenone                               | $C_{18}H_{26}O$   |  |
| <b>Apo14</b>   | $\beta$ -apo-14'-carotenal                               | $C_{22}H_{30}O$   |  |
| <b>Apo15</b>   | $\beta$ -apo-15-carotenal                                | $C_{20}H_{28}O$   |  |
| <b>OH-Apo8</b> | 3-OH- $\beta$ -apo-8'-carotenal                          | $C_{30}H_{40}O_2$ |  |
| <b>OH-Apo9</b> | 3-OH- $\beta$ -apo-8'-carotenal<br>(OH- $\beta$ -ionone) | $C_{13}H_{20}O_2$ |  |

|                 |                                        |                   |                                                                                     |
|-----------------|----------------------------------------|-------------------|-------------------------------------------------------------------------------------|
| <b>OH-Apo10</b> | 3-OH-β-apo-10'-carotenal               | $C_{27}H_{36}O_2$ | 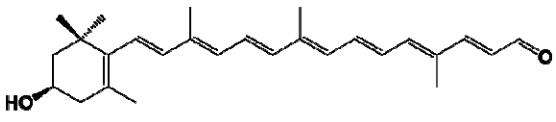  |
| <b>OH-Apo11</b> | 3-OH-β-apo-11-carotenal                | $C_{15}H_{22}O_2$ |   |
| <b>OH-Apo12</b> | 3-OH-β-apo-12'-carotenal               | $C_{25}H_{34}O_2$ |   |
| <b>OH-Apo13</b> | 3-OH-β-apo-13-carotenone<br>(zaxinone) | $C_{18}H_{26}O_2$ |   |
| <b>OH-Apo14</b> | 3-OH-β-apo-14'-carotenal               | $C_{22}H_{30}O_2$ |   |
| <b>OH-Apo15</b> | 3-OH-β-apo-15-carotenal                | $C_{20}H_{28}O_2$ |  |

744 **Figure legends**

745 **Fig. 1. Heatmap of root (A) and shoot (B) gene expression of the three-time points (7, 21, 35**  
746 **dpi: days post inoculation) and the three analyzed conditions (-Pi, MYC, +Pi).** Data are means  
747  $\pm$  SE ( $n \leq 4$ ). For each gene and time point, the value of the corresponding -Pi sample was set to 1.  
748 Asterisks indicate statistically significant differences referred to the -Pi condition, separately for  
749 each time point, by one way-Anova (\* $P < 0.05$ ; \*\* $P < 0.01$ ; \*\*\* $P < 0.001$ ). The circles represented the  
750 different stages of mycorrhization: at the early stage (7 dpi), the fungus structures, hyphopodia,  
751 adhered to the root epidermis, during the middle stage (21 dpi), the arbuscules started their  
752 development that will be completed at the later stage (35 dpi). Heatmaps were generated with the  
753 MultiExperiment Viewer (MeV) software.  
754 -Pi: 3.2  $\mu$ M Pi; myc: mycorrhizal plants grown at 3.2  $\mu$ M Pi; +Pi: 500  $\mu$ M Pi.

755 **Fig. 2. Principal component analysis of root and shoot CCDs genes expression across the**  
756 **three-time points and the three growth conditions (-P, MYC, +P).** Loading plot (A) and scores  
757 plot (B) with the third and fifth principal components. In the scores plot (B) for both groups the  
758 lines connecting each sample lead to the cluster center.

759 **Fig. 3. Heatmap of root (A) and shoot (B) apocarotenoids quantification across the three time**  
760 **points and the three analyzed conditions (-P, MYC, +P).** For each APOs and time point, the  
761 value of the corresponding -Pi was set to 1. Data are means  $\pm$  SE ( $n \leq 4$ ). Asterisks indicate  
762 statistically significant differences as compared to -P condition, separately for each time point, by  
763 one way-Anova (\* $P < 0.05$ ; \*\* $P < 0.01$ ; \*\*\* $P < 0.001$ ). The circles represented the different stages of  
764 mycorrhization: at the early stage (7 dpi), the fungus structures, called hyphopodia, adhered to the  
765 root epidermis, during the middle stage (21 dpi), the arbuscules started their development that will  
766 be completed at the later stage (35 dpi). The apocarotenoids indicated with asterisks represented the  
767 isoform of the corresponding apocarotenoid. Heatmaps were generated with the MultiExperiment  
768 Viewer (MeV) software.

769 **Fig. 4. Principal component analysis of root and shoot APOs across the three growth stages**  
770 **and conditions (-P, MYC, +P).** Loading plot (A) and scores plot (B) with the second and third  
771 principal components. In the scores plot (B) for both groups the lines connecting each sample lead  
772 to the cluster center.

773 **Figure 5. Principal component analysis of root and shoot genes and apocarotenoids datasets**  
774 **fused and analyzed across the three time points and growth conditions (-P, MYC, +P).**  
775 Loading plot (A) and scores plot (B) with the first and second principal components.

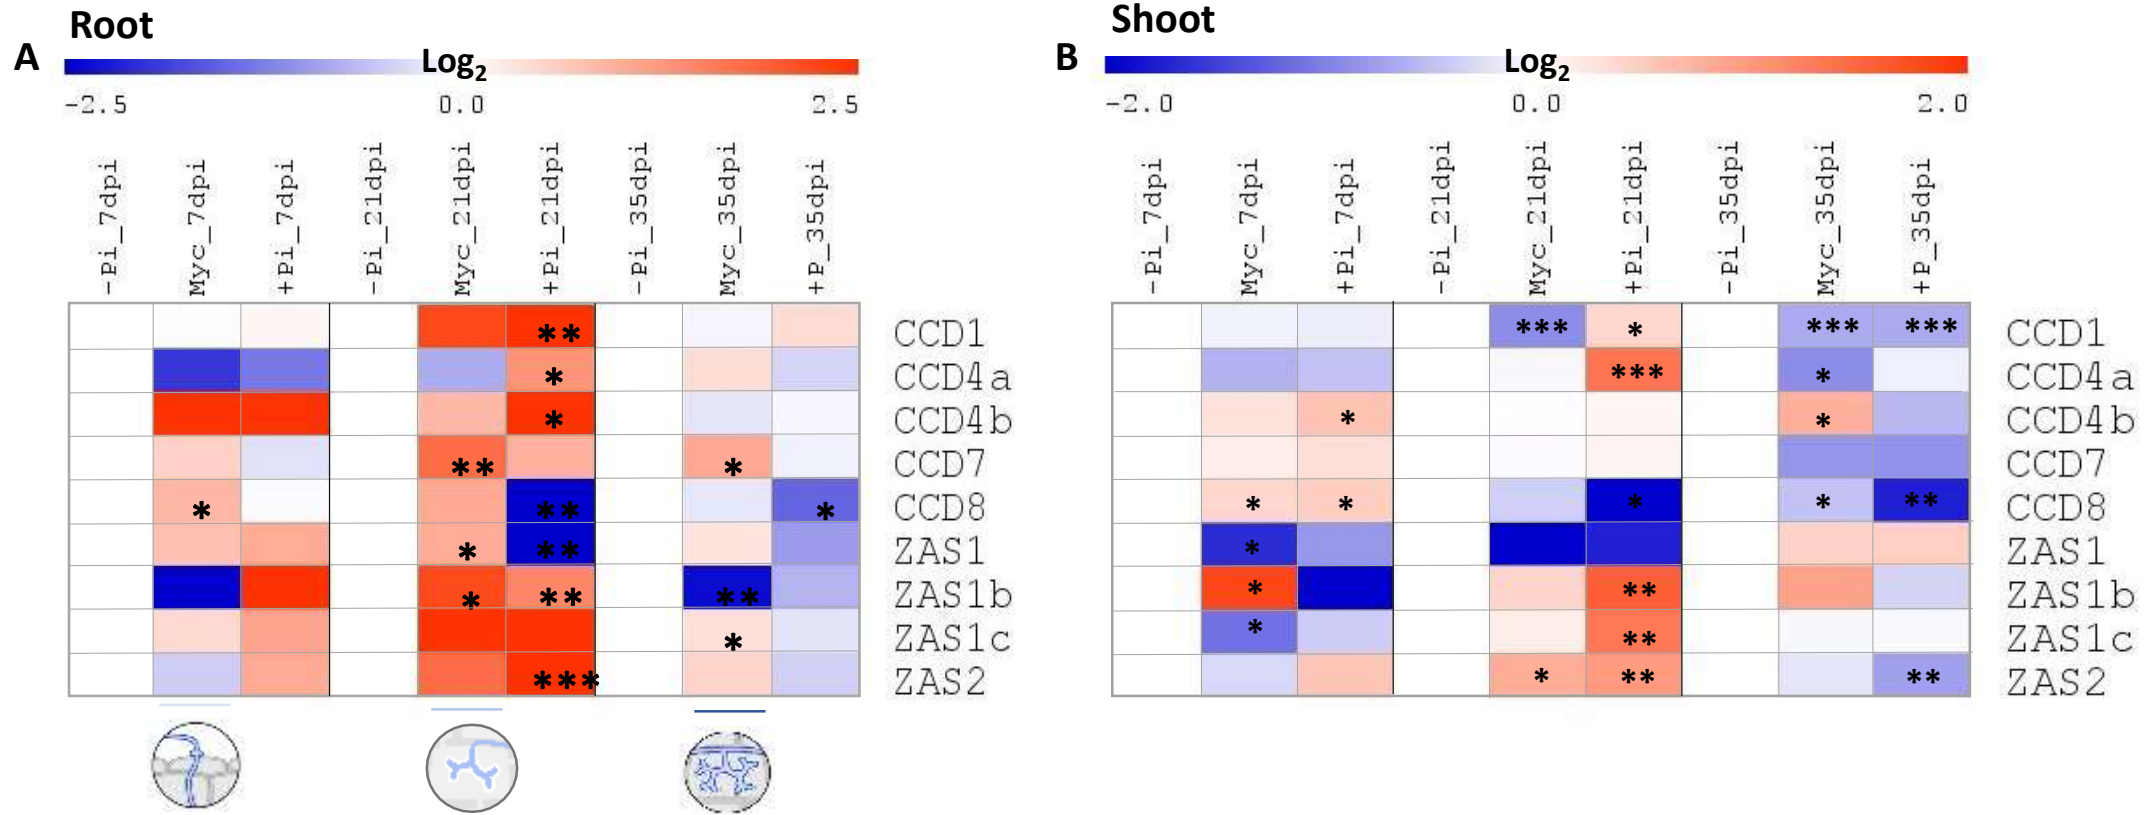

**Figure 1.** Heatmap of root (A) and shoot (B) gene expression of the three-time points ( 7, 21, 35 dpi: days post inoculation) and the three analyzed conditions (-Pi, MYC, +Pi). Data are means  $\pm$  SE ( $n \leq 4$ ). For each gene and time point, the value of the corresponding -Pi sample was set to 1. Asterisks indicate statistically significant differences referred to the -Pi condition, separately for each time point, by one way-Anova (\* $P < 0.05$ ; \*\* $P < 0.01$ ; \*\*\* $P < 0.001$ ). The circles represented the different stages of mycorrhization: at the early stage (7 dpi), the fungus structures, hyphopodia, adhered to the root epidermis, during the middle stage (21 dpi), the arbuscules started their development that will be completed at the later stage (35 dpi). Heatmaps were generated with the MultiExperiment Viewer (MeV) software.

-Pi: 3.2  $\mu$ M Pi; myc: mycorrhizal plants grown at 3.2  $\mu$ M Pi; +Pi: 500  $\mu$ M Pi.

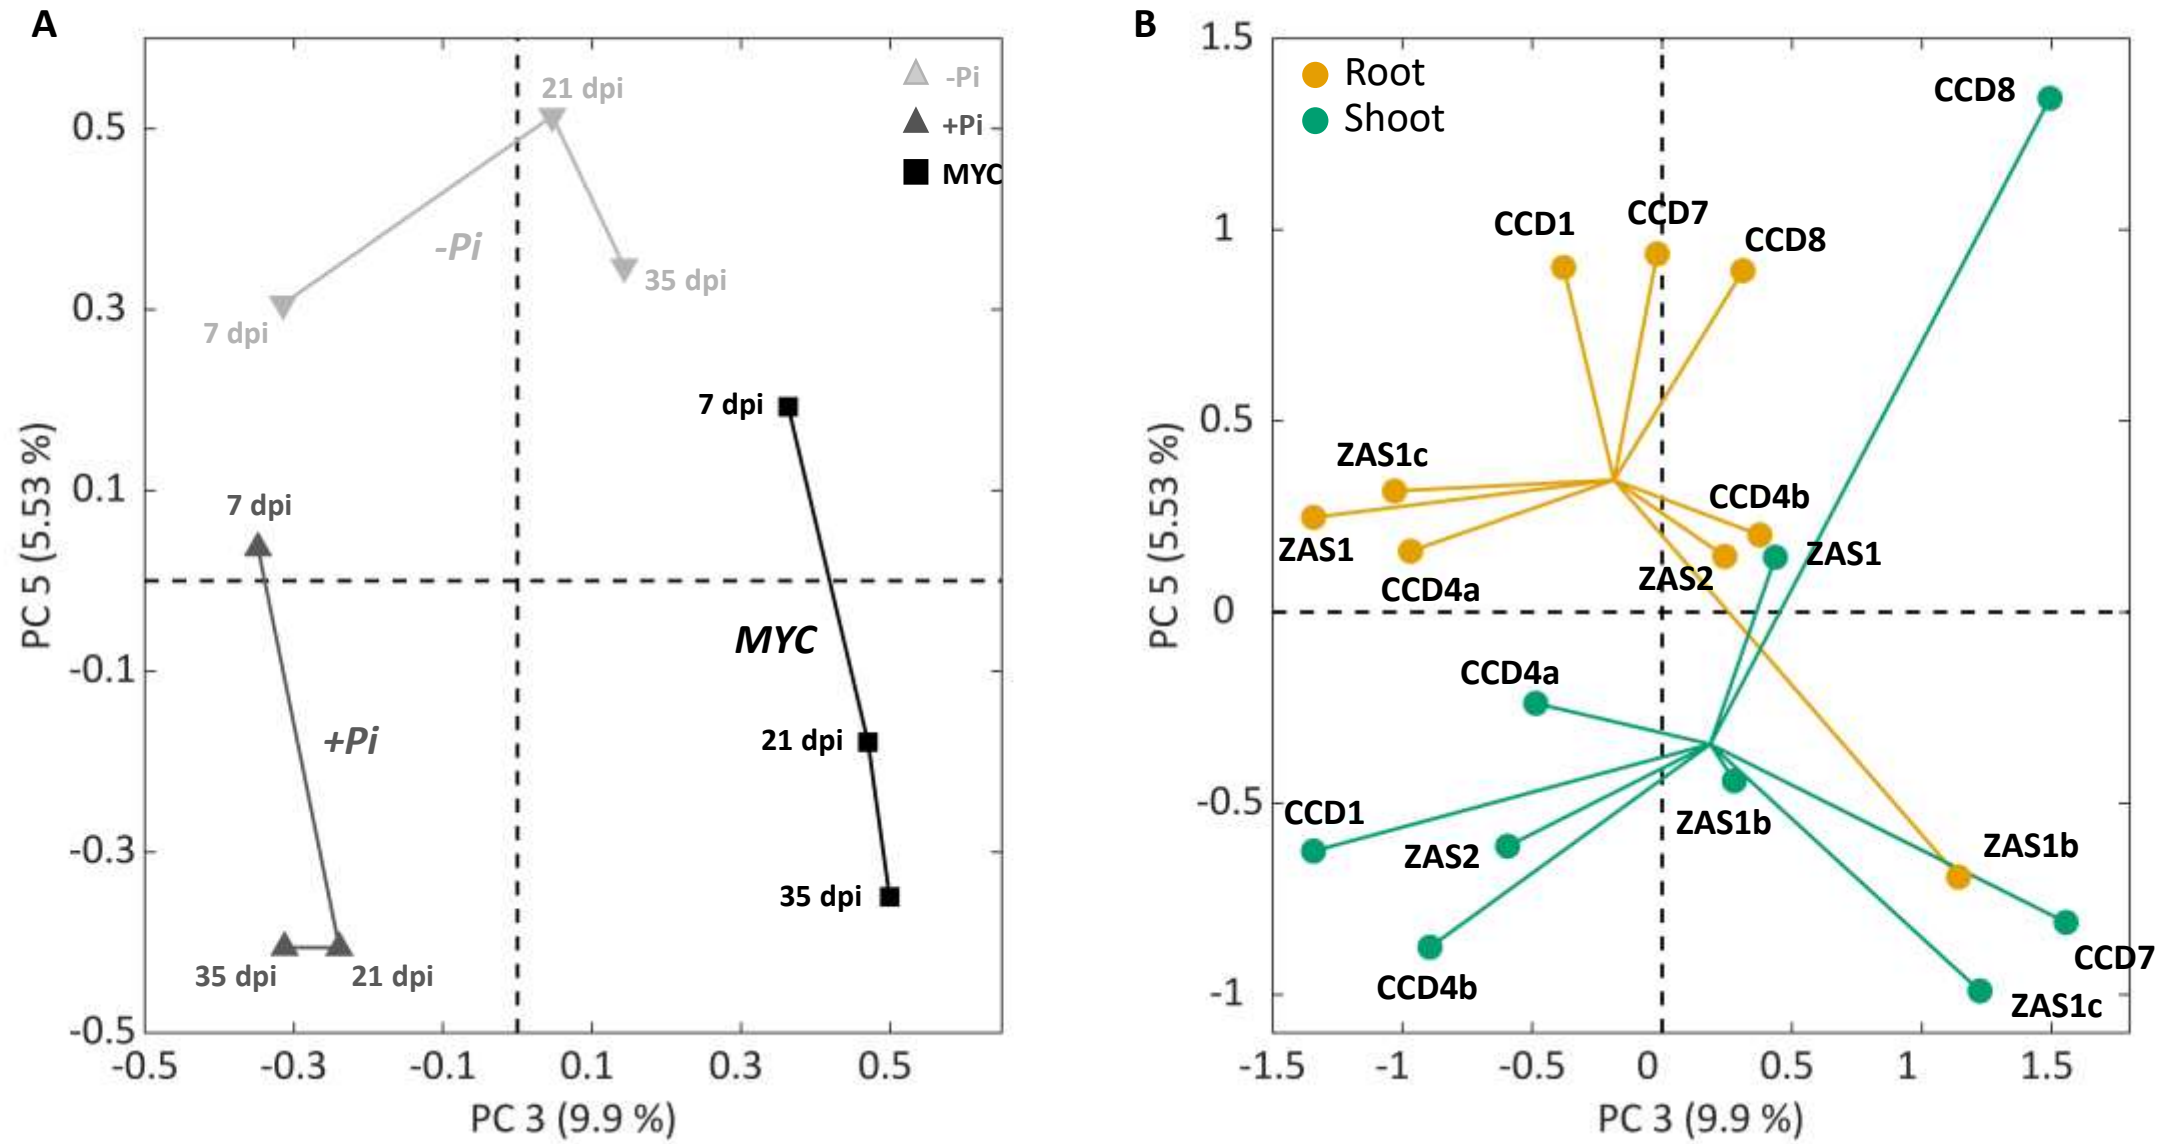

**Figure 2.** Principal component analysis of root and shoot CCDs genes expression across the three-time points and the three growth conditions (-Pi, MYC, +Pi). Loadings plot (A) and scores plot (B) show the third and fifth principal components. In the scores plot (B) for both groups the lines connecting each sample lead to the cluster center.

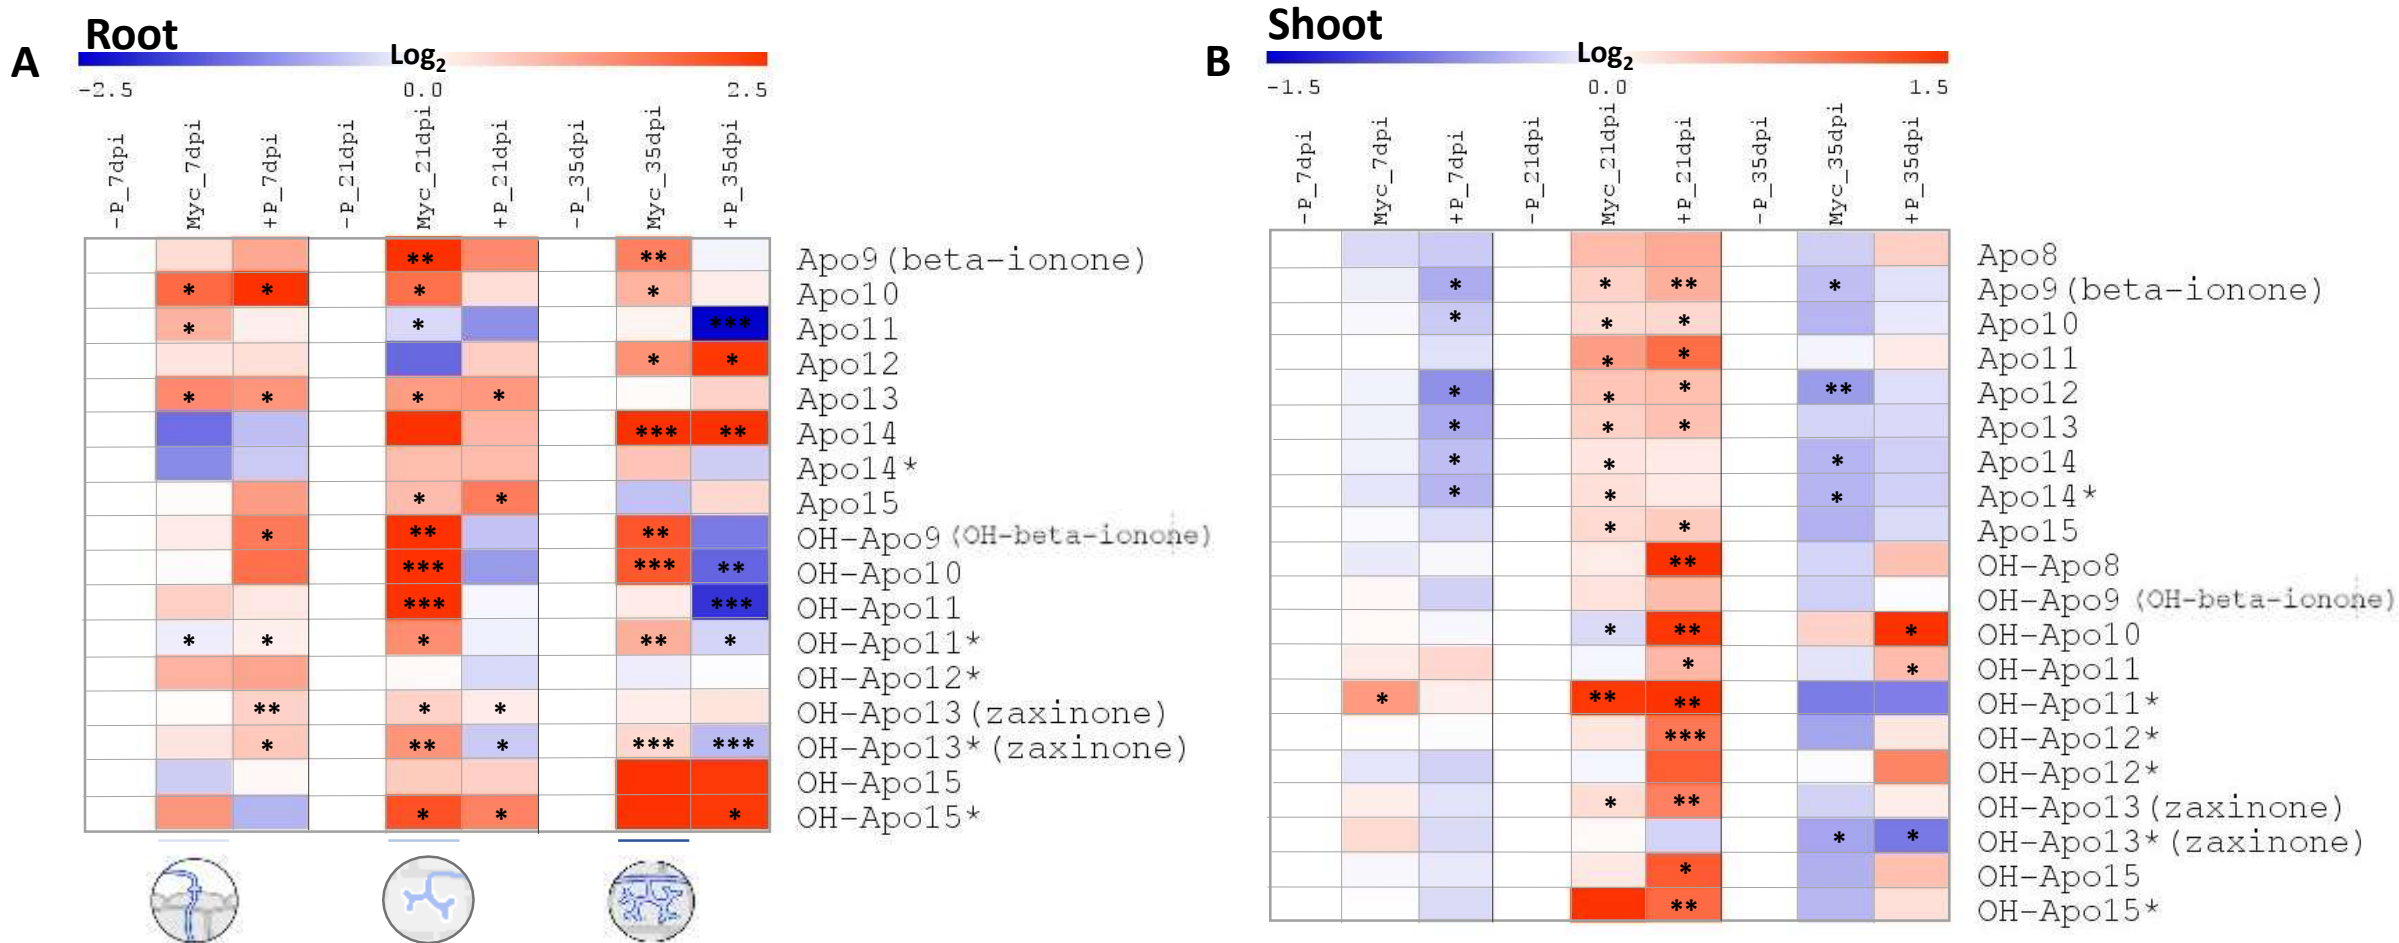

**Figure 3.** Heatmap of root (A) and shoot (B) apocarotenoids quantification across the three time points and the three analyzed conditions (-P, MYC, +P). For each APOs and time point, the value of the corresponding -Pi was set to 1. Data are means  $\pm$  SE ( $n \leq 4$ ). Asterisks indicate statistically significant differences as compared to -P condition, separately for each time point, by one way-Anova (\* $P < 0.05$ ; \*\* $P < 0.01$ ; \*\*\* $P < 0.001$ ). The circles represented the different stages of mycorrhization: at the early stage (7 dpi), the fungus structures, called hyphopodia, adhered to the root epidermis, during the middle stage (21 dpi), the arbuscules started their development that will be completed at the later stage (35 dpi). The apocarotenoids indicated with asterisks represented the isoform of the corresponding apocarotenoid. Heatmaps were generated with the MultiExperiment Viewer (MeV) software.



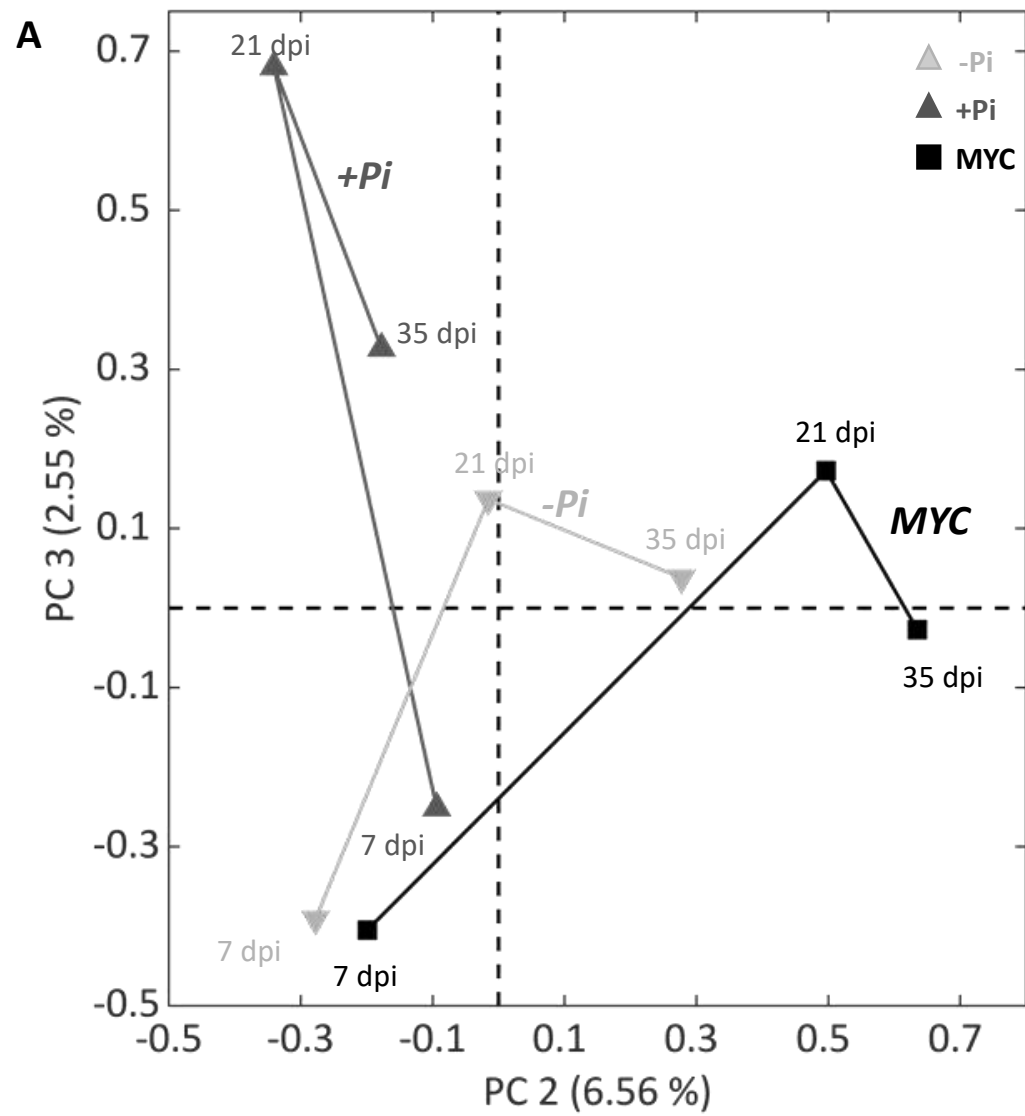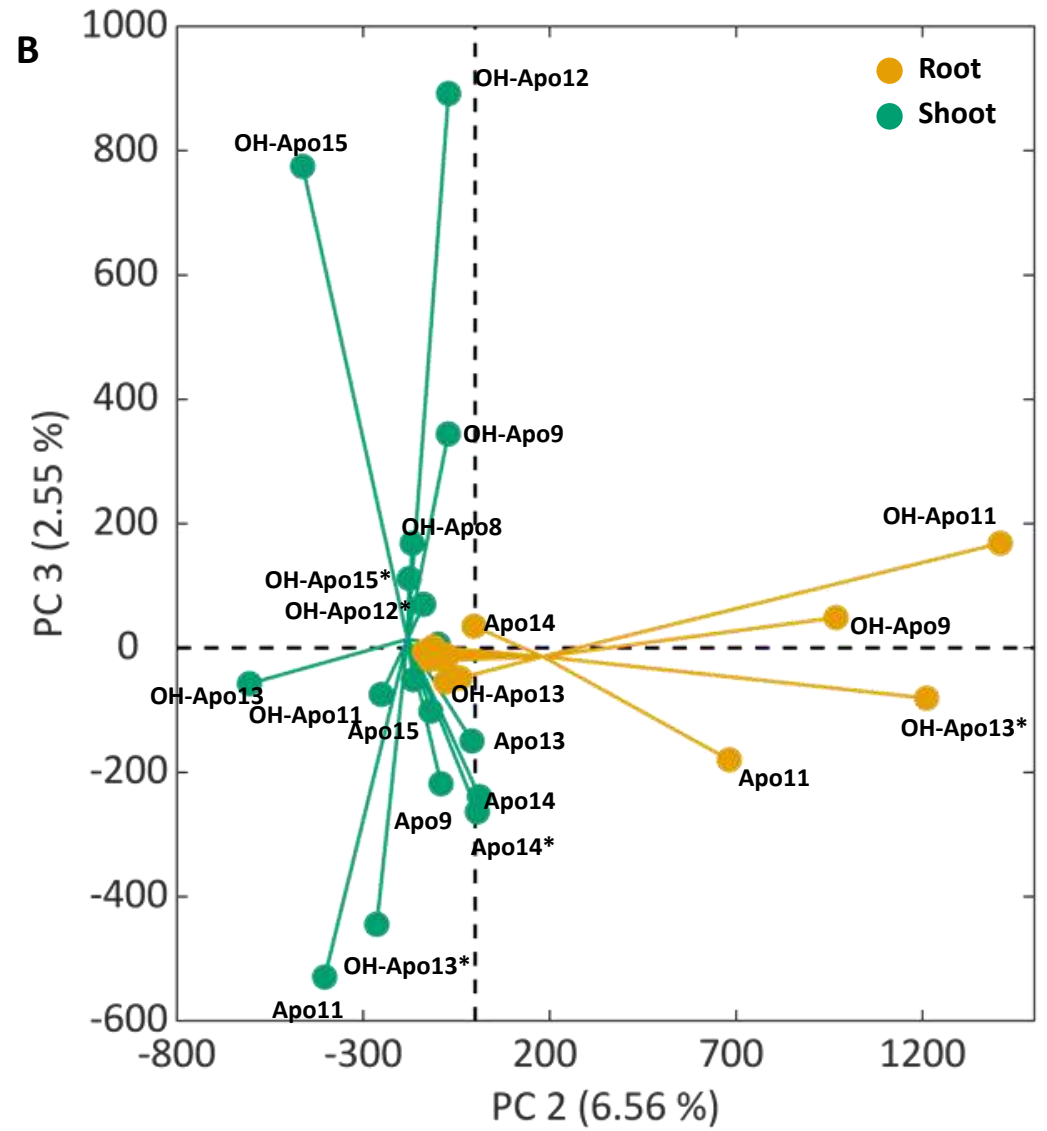

**Figure 4.** Principal component analysis of root and shoot APOs across the three-time points and the three growth conditions (-Pi, MYC, +Pi). Loadings plot (A) and scores plot (B) show the second and third principal components. In the scores plot (B) for both groups the lines connecting each sample lead to the cluster center.

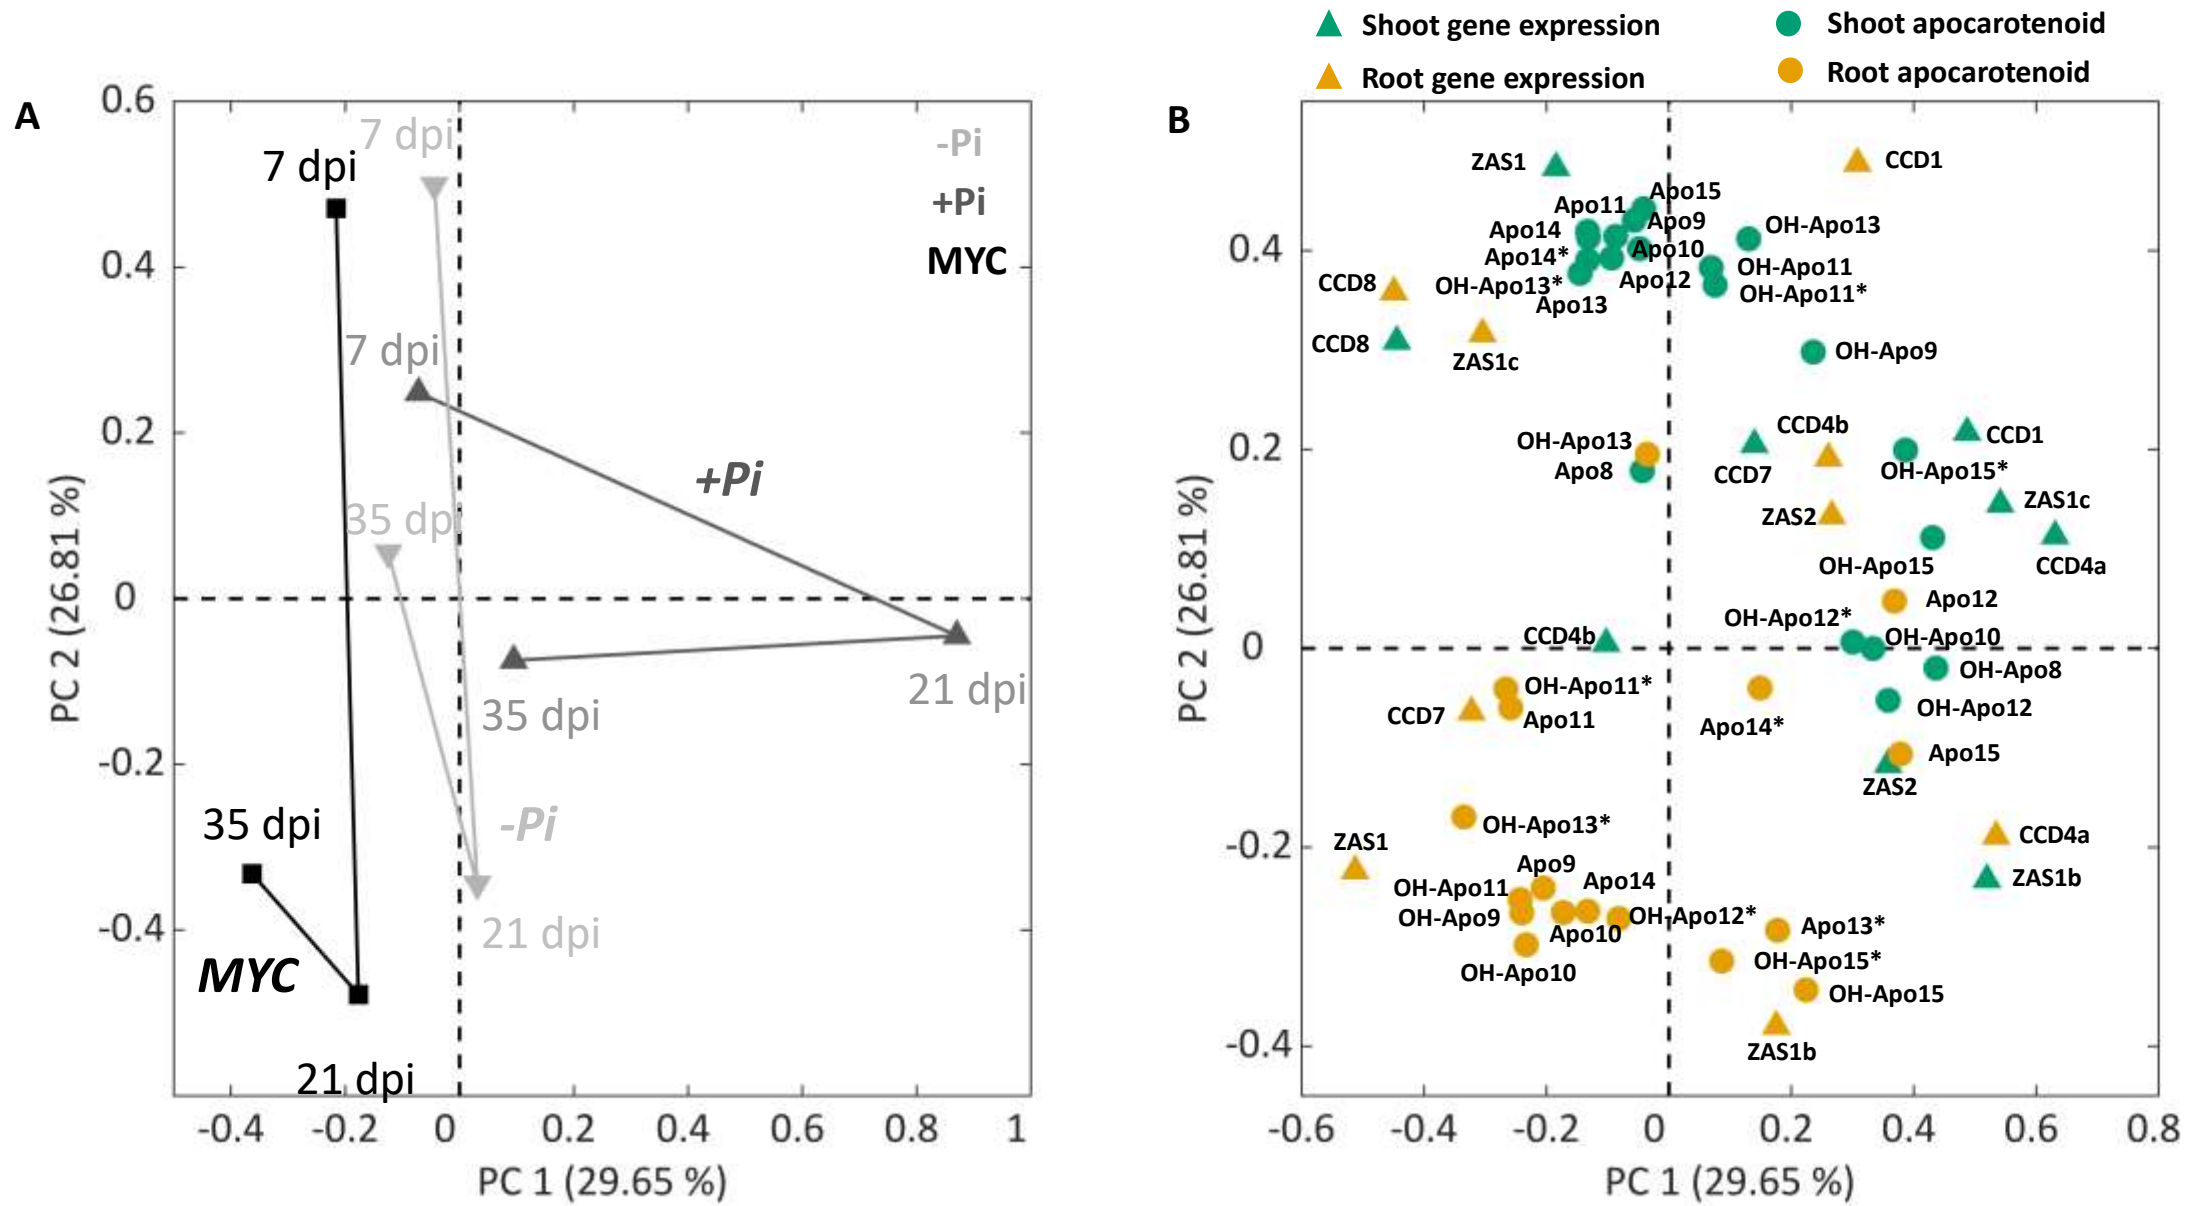

**Figure 5.** Principal component analysis of root and shoot genes and apocarotenoids datasets fused and analysed across the three-time points and the three growth conditions (-Pi, MYC, +Pi). Loadings plot (A) and scores plot (B) show the first and second principal components. The apocarotenoids indicated with asterisks represent the isoform of the corresponding apocarotenoid.
